# Supplementary material for: Stealth nanorods via the aqueous living crystallisation-driven self-assembly of poly(2-oxazoline)s
Source: Royal Society of Chemistry journal article supplement (doi:10.1039/d1sc00938a), 2021-01-01
Supplement: d1sc00938a1.pdf [file d1sc00938a1.pdf]

## SUPPORTING INFORMATION

---

# Stealth Nanorods via the Aqueous Living Crystallisation-Driven Self-Assembly of Poly(2-oxazoline)s

John R. Finnegan,<sup>[a]</sup> Emily H. Pilkington,<sup>[a],[b]</sup> Karen Alt,<sup>[c]</sup> Md. Arifur Rahim,<sup>[d]</sup> Stephen J. Kent,<sup>[b]</sup> Thomas P. Davis\*<sup>[a],[e]</sup> and Kristian Kempe\*<sup>[a],[f]</sup>

<sup>a</sup> ARC Centre of Excellence in Convergent Bio-Nano Science and Technology, Drug Delivery, Disposition and Dynamics, Monash Institute of Pharmaceutical Sciences, Monash University, Parkville, Victoria 3052, Australia

<sup>b</sup> ARC Centre of Excellence in Convergent Bio-Nano Science, Department of Microbiology and Immunology, Peter Doherty Institute for Infection and Immunity, The University of Melbourne, Parkville, Victoria 3010, Australia

<sup>c</sup> NanoTheranostics Laboratory, Australian Centre for Blood Diseases, Monash University, Melbourne, Victoria 3004, Australia

<sup>d</sup> School of Chemical Engineering, University of New South Wales (UNSW), Sydney, NSW 2052, Australia

<sup>e</sup> Australian Institute for Bioengineering and Nanotechnology, The University of Queensland, Brisbane, QLD 4072, Australia

<sup>f</sup> Materials Science and Engineering, Monash University, Clayton, VIC 3800, Australia

## Contents

|                                     |    |
|-------------------------------------|----|
| Materials and Methods.....          | 2  |
| Synthetic Procedures .....          | 3  |
| Self-Assembly Procedures.....       | 5  |
| Biology .....                       | 6  |
| Supporting Schemes and Tables ..... | 7  |
| Supporting Figures.....             | 10 |
| References .....                    | 23 |

## Materials and Methods

All moisture-sensitive reactions were carried out in oven (100 °C) dried glassware under a positive nitrogen pressure using standard Schlenk techniques. All compounds were purchased from Sigma-Aldrich and used without further purification unless stated otherwise. Methyl *p*-toluenesulfonate was purified by fractional distillation under reduced pressure. Anhydrous acetonitrile was stored over activated 3 Å molecular sieves prior to use. 2-Methyl-2-oxazoline was purified by distillation over BaO. 2-Isopropyl-2-oxazoline (*i*PrOx) was synthesised following the procedure outlined in ref. [1] and purified by distillation over BaO. Cyanine5-NHS ester was purchased from Lumiprobe.

Nuclear magnetic resonance (NMR) spectra were recorded on a Bruker Avance III 400 MHz spectrometer using an external lock and referenced internally to a resonance from residual protonated solvent. Chemical shifts ( $\delta$ ) are reported in parts per million (ppm). NMR solvents (CDCl<sub>3</sub> and D<sub>2</sub>O) were purchased from Cambridge Isotope Laboratories, Inc and used as received.

Size-exclusion chromatography (SEC) analyses of polymer samples were performed using a Shimadzu modular system comprising a DGU-20A3R degasser unit, an SIL-20A HT autosampler, a 10.0  $\mu$ m bead-size guard column (50  $\times$  7.8 mm) followed by three KF-805L columns (300  $\times$  8 mm, bead size: 10  $\mu$ m, pore size maximum: 5000 Å), a SPD-20A UV/Vis detector, and an RID-10A differential refractive-index detector. The temperature of columns was maintained at 40 °C using a CTO-20A oven. The eluent was 0.03 wt% LiBr in *N,N*-dimethylacetamide (DMAc, CHROMASOLV Plus for HPLC) and the flow rate kept at 1.0 mL/min using a LC-20AD pump. A molecular weight calibration curve was produced using commercial narrow molecular weight distribution polystyrene standards with molecular weights ranging from 500 to  $2 \times 10^6$  Da. Polymer solutions were analysed at 2 mg/mL after filtration through 0.45  $\mu$ m PTFE membrane.

Dynamic light scattering (DLS) and zeta potential measurements were performed using a Malvern Zetasizer Nano ZS. Cloud point temperature was determined by DLS analysis of filtered 10 mg/mL polymer solutions in Milli-Q water in a disposable sizing cuvette (Malvern, Zen0040). Polymer solutions were heated in 2 °C increments from 30 to 70 °C, equilibrating for 120 s and recording 3 measure of at least 10 runs at each temperature. Zeta potential measurements were carried out at 25 °C on unfiltered 1 mg/mL nanorod suspensions in Milli-Q water in a disposable folded capillary cuvette (Malvern, DTS1070). Values shown represent the mean and standard deviation of three measurements comprised of a minimum of ten runs each.

Transmission electron microscopy (TEM) was performed using either a Tecnai F20 or a Thermo Scientific Talos L120C microscope, both instruments were operated at 200 kV. Samples for TEM analysis were prepared by cooling polymer suspensions to room temperature followed by the addition of 5  $\mu$ L of colloidal solution to a negative glow discharge treated carbon coated copper grid (ProSciTech). After approximately 60 s excess sample solution was removed by contact with filter paper. Samples to be stained with UranylLess (Electron Microscopy Sciences) were then placed onto a single drop of UranylLess solution for 50 s. Excess stain solution was removed by contact with filter paper and the grid allowed to air dry prior to imaging.

Analysis of TEM images was carried out using ImageJ software (National Institute of Health). Number average ( $L_n$ ) and weight average particle length ( $L_w$ ) were calculated using the equations below.

$$L_n = \frac{\sum n_i L_i}{\sum n_i}, L_w = \frac{\sum n_i L_i^2}{\sum n_i L_i}, W_n = \frac{\sum n_i W_i}{\sum n_i}$$

Atomic force microscopy (AFM) was performed using a Bruker dimension icon SPM (USA). A triangular silicon nitride cantilever (ScanAsyst Air probe, spring constant 0.4 N/m, Bruker) with a tip radius of 2–10 nm was used for the topographic analysis. Samples were scanned with the PeakForce Tapping mode with a scan rate of 0.70 Hz. While scanning, the peak force and feedback gain were dynamically optimized by the ScanAsyst auto control. NanoScope Analysis 2.0 software was used to process the raw data and height analyses. Samples were prepared by adding 50  $\mu$ L of nanoparticle solution to freshly cleaved mica. Excess solvent was removed by blotting with filter paper and the substrate dried under N<sub>2</sub> flow.

Differential scanning calorimetry (DSC) was performed using a PerkinElmer DSC8500 coupled to a PerkinElmer Intracooler 2 cooling system at a scanning rate of 10 °C·min<sup>-1</sup>. Samples were sealed in 50  $\mu$ L aluminium pans featuring a pinhole lid.

X-ray diffraction was carried out using a Bruker D8 Advance with Cu K-alpha radiation ( $\lambda = 1.5406$  Å) and Lynxeye XE position sensitive detector running in 1D mode. Scatter was collected using Bragg-Brentano reflection geometry, a viable divergence slit was used with a constant sample illumination width at 17 mm. Diffraction peak positions and d-spacings were determined using Bruker DIFFRAC.EVA software.

Sonication. A Sonics VC 505 ultrasonic processor was used fitted with a 1/8 " tapered probe.

## Synthetic Procedures

Poly(2-methyl-2-oxazoline)<sub>n</sub>-*block*-poly(2-isopropyl-2-oxazoline)<sub>m</sub> (PMeOx<sub>n</sub>-*b*-PiPrOx<sub>m</sub>, where *n* and *m* represent average degree of polymerisation) were synthesised following the general procedure outlined below for PMeOx<sub>48</sub>-*b*-PiPrOx<sub>47</sub>.

**PMeOx<sub>48</sub>-*b*-PiPrOx<sub>47</sub>.** Methyl *p*-toluenesulfonate (35.6 μL, 0.24 mmol, 1 eq), anhydrous acetonitrile (4.9 mL) and 2-methyl-2-oxazoline (1.0 mL, 12 mmol, 50 eq) were transferred under nitrogen to an oven-dried greaseless Schlenk flask equipped with magnetic stirrer. The flask was then sealed and the reaction mixture heated with stirring to 80 °C for 7.5 h. A 0.3 mL aliquot was removed from the reaction mixture for molecular weight analysis of the PMeOx block, then 2-isopropyl-2-oxazoline (1.3 mL, 11 mmol, 50 eq) added, the flask sealed and the reaction mixture stirred at 80 °C for a further 16 h. To quench the polymerisation acetic acid (64 μL, 1.1 mmol, 5 eq) and triethylamine (156 μL, 1.1 mmol, 5 eq) were added and the reaction mixture stirred for 5 h at 60 °C. The resulting block copolymer was then precipitated directly into diethyl ether, followed by two subsequent precipitations from CH<sub>2</sub>Cl<sub>2</sub> into diethyl ether. The resulting colourless solid was dialysed against water for 3 d using 12-14 kDa MWCO dialysis tubing (Cellu-Sep T3) and isolated by freeze-drying. Yield = 1.3 g (59%)

<sup>1</sup>H NMR (400 MHz, D<sub>2</sub>O) δ: 4.33 – 4.25 (s, CONCH<sub>2</sub>, 2H), 4.21 – 3.08 (m, NCH<sub>2</sub>CH<sub>2</sub>, 378H), 3.10 – 2.60 (d, CH<sub>3</sub>CHCH<sub>3</sub>, 47H), 2.26 – 1.91 (m, COCH<sub>3</sub>, 144H), 1.56 – 0.67 (m, 2CH<sub>3</sub>, 282H).  
SEC (RI, DMAc): *M<sub>n</sub>* (*Đ<sub>m</sub>*) = 18,200 Da (1.07)

**PMeOx<sub>24</sub>-*b*-PiPrOx<sub>50</sub>.** Yield = 1.2 g (71%)

<sup>1</sup>H NMR (400 MHz, D<sub>2</sub>O) δ: 4.33 – 4.25 (s, CONCH<sub>2</sub>, 2H), 4.20 – 3.14 (m, NCH<sub>2</sub>CH<sub>2</sub>, 294H), 3.09 – 2.60 (d, CH<sub>3</sub>CHCH<sub>3</sub>, 50H), 2.46 – 1.87 (m, COCH<sub>3</sub>, 72H), 1.48 – 0.73 (m, 2CH<sub>3</sub>, 300H).  
SEC (RI, DMAc): *M<sub>n</sub>* (*Đ<sub>m</sub>*) = 14,900 Da (1.05)

**PMeOx<sub>96</sub>-*b*-PiPrOx<sub>49</sub>.** Yield = 2.5 g (65%)

<sup>1</sup>H NMR (400 MHz, D<sub>2</sub>O) δ: 4.33 – 4.25 (s, CONCH<sub>2</sub>, 2H), 4.10 – 3.14 (m, NCH<sub>2</sub>CH<sub>2</sub>, 578H), 3.04 – 2.63 (d, CH<sub>3</sub>CHCH<sub>3</sub>, 49H), 2.45 – 1.80 (m, COCH<sub>3</sub>, 288H), 1.50 – 0.70 (m, 2CH<sub>3</sub>, 294H).  
SEC (RI, DMAc): *M<sub>n</sub>* (*Đ<sub>m</sub>*) = 28,200 Da (1.13)

**PiPrOx<sub>40</sub>-phthalimide.** Methyl *p*-toluenesulfonate (50.7 μL, 0.3 mmol, 1 eq), anhydrous acetonitrile (6.3 mL) and 2-isopropyl-2-oxazoline (2.0 mL, 16.8 mmol, 50 eq) were transferred under nitrogen to an oven-dried greaseless Schlenk flask equipped with magnetic stirrer. The flask was then sealed and the reaction mixture heated to 80 °C for 10.5 h. To quench the reaction potassium phthalimide (0.080 g, 0.43 mmol, 1.4 eq) was added and the reaction mixture stirred at 70 °C for 14 h. Solids were removed by filtration and volatiles removed under vacuum. The resulting residue was dissolved in CH<sub>2</sub>Cl<sub>2</sub>, washed twice with saturated NaHCO<sub>3</sub>, and once with brine then dried over MgSO<sub>4</sub>. The volume of the solution was reduced under vacuum and PiPrOx<sub>39</sub>-phthalimide precipitated into petroleum benzene. After a further precipitation PiPrOx<sub>39</sub>-phthalimide was isolated as a white solid. Yield = 1.5 g (79%)

<sup>1</sup>H NMR (400 MHz, CDCl<sub>3</sub>) δ: 8.00 – 7.60 (m, Ar, 4H), 3.96 – 3.79 (m, CH<sub>2</sub>N<sub>2</sub>CO, 2H), 3.79 – 3.15 (m, NCH<sub>2</sub>CH<sub>2</sub>, 158H), 3.04 – 2.50 (d, CH<sub>3</sub>CHCH<sub>3</sub>, 40H), 1.48 – 0.73 (m, 2CH<sub>3</sub>, 240H).

**PiPrOx<sub>40</sub>-NH<sub>2</sub>.** In a 50 mL round-bottom flask fitted with magnetic stirrer PiPrOx<sub>40</sub>-phthalimide (1.0 g, 0.21 mmol, 1 eq) was dissolved in ethanol (25 mL) followed by the addition of hydrazine monohydrate (162 μL, 3.3 mmol, 16 eq). The reaction mixture was then heated to reflux for 22 h, cooled to room temperature and filtered. Subsequently, 5 M HCl (aq) was added to adjust the pH value of the solution to 2 and the resulting precipitate removed by filtration. Volatiles were then removed under vacuum and the residue dissolved in water. Saturated NaOH (aq) was added to increase the pH value of the solution to 10. This solution was then extracted with CH<sub>2</sub>Cl<sub>2</sub> and washed three times with water. The organic layer was dried over MgSO<sub>4</sub> and concentrated under vacuum. PiPrOx<sub>40</sub>-NH<sub>2</sub> was isolated by precipitation into petroleum benzene. Yield = 410 mg (41%)

<sup>1</sup>H NMR (400 MHz, CDCl<sub>3</sub>) δ: 3.79 – 3.15 (m, NCH<sub>2</sub>CH<sub>2</sub>, 160H), 3.04 – 2.50 (d, CH<sub>3</sub>CHCH<sub>3</sub>, 40H), 1.48 – 0.73 (m, 2CH<sub>3</sub>, 240H).  
SEC (RI, DMAc): *M<sub>n</sub>* (*Đ<sub>m</sub>*) = 5,060 Da (1.10)

**PiPrOx<sub>40</sub>-Cy5.** In an oven-dried greaseless Schlenk flask, PiPrOx<sub>40</sub>-NH<sub>2</sub> (25 mg, 0.006 mmol, 1 eq), Cy5-NHS (8 mg, 0.013 mmol, 2.2 eq) and triethylamine (100 μL, 0.717 mmol, 120 eq) were dissolved in anhydrous *N,N*-dimethylformamide (1.5 mL). The reaction mixture was stirred under nitrogen in absence of light at room temperature for 14 h. Volatiles were removed under vacuum and the residue was redissolved in 5.0 mL of CHCl<sub>3</sub>. Excess Cy5 was removed by preparative size exclusion column chromatography (Bio-Beads<sup>TM</sup> S-X1, 600 – 14000 MW exclusion range) and PiPrOx<sub>40</sub>-Cy5 isolated as a blue solid by freeze-drying. Yield = 24 mg (96%).

<sup>1</sup>H NMR (400 MHz, D<sub>2</sub>O) δ: 8.16 – 7.93 (br, CHCHCH, 2H), 7.68 – 7.20 (m, ArH, 8H), 6.71 – 6.48 (br, CHCHCH, H), 6.36 – 6.16 (br, 2CCHCH, 2H), 4.56 – 4.37 (br, NHCH<sub>2</sub>CH<sub>2</sub>N, 2H), 3.96 – 3.16 (m, NCH<sub>2</sub>CH<sub>2</sub>, 158H), 2.86 (d, CH<sub>3</sub>CHCH<sub>3</sub>, 40H), 1.74 – 1.58 (s, 4CH<sub>3</sub>, 12H), 1.42 – 0.74 (m, 2CH<sub>3</sub>, 240H).

SEC (RI, DMAc): *M<sub>n</sub>* (*Đ<sub>m</sub>*) = 4,444 Da (1.12)

**PMeOx<sub>48</sub>-*b*-PiPrOx<sub>39</sub>-phthalimide.** Methyl *p*-toluenesulfonate (17.8 μL, 0.1 mmol, 1 eq), anhydrous acetonitrile (2.4 mL) and 2-methyl-2-oxazoline (0.5 mL, 5.9 mmol, 50 eq) were transferred under nitrogen to an oven-dried greaseless Schlenk flask equipped with magnetic stirrer. The flask was then sealed and the reaction mixture heated to 80 °C for 7.5 h. A 0.3 mL aliquot was removed from the reaction mixture for molecular weight analysis of the PMeOx block, then 2-isopropyl-2-oxazoline (0.6 mL, 5.1 mmol, 50 eq) added, the

## SUPPORTING INFORMATION

flask sealed and the reaction mixture stirred at 80 °C for a further 16 h. To quench the reaction potassium phthalimide (0.150 g, 0.81 mmol, 8 eq) was added and the reaction mixture stirred at 70 °C for 14 h. Solids were removed by filtration and volatiles removed under vacuum. The resulting block copolymer was then precipitated directly into diethyl ether, followed by two subsequent precipitations from CH<sub>2</sub>Cl<sub>2</sub> into diethyl ether. The resulting colourless solid was used without further purification. Yield = 0.7 g (65%)

<sup>1</sup>H NMR (400 MHz, D<sub>2</sub>O) δ: 7.96 – 7.82 (m, Ar, 4H), 4.00 – 3.87 (s, CONCH<sub>2</sub>, 2H), 4.21 – 3.08 (m, NCH<sub>2</sub>CH<sub>2</sub>, 352H), 3.10 – 2.60 (d, CH<sub>3</sub>CHCH<sub>3</sub>, 39H), 2.26 – 1.91 (m, COCH<sub>3</sub>, 144H), 1.56 – 0.67 (m, 2CH<sub>3</sub>, 234H).

SEC (RI, DMAc):  $M_n$  ( $\bar{M}_m$ ) = 16,700 Da (1.10)

**PMeOx<sub>48</sub>-b-PiPrOx<sub>39</sub>-NH<sub>2</sub>.** In a 50 mL round-bottom flask fitted with magnetic stirrer PMeOx<sub>48</sub>-b-PiPrOx<sub>39</sub>-phthalimide (0.7 g, 0.08 mmol, 1 eq) was dissolved in ethanol (25 mL) followed by the addition of hydrazine monohydrate (47 μL, 0.86 mmol, 11 eq). The reaction mixture was then heated to reflux for 22 h, cooled to room temperature and filtered. Subsequently, 5 M HCl (aq) was added to adjust the pH value of the solution to 2 and the resulting precipitate removed by filtration. Volatiles were then removed under vacuum and the residue dissolved in water. Saturated NaOH (aq) was added to increase the pH value of the solution to 10. This solution was transferred to 12-14 kDa MWCO dialysis tubing (Cellu-Sep T3), dialysed against water for 3 d and isolated by freeze-drying. The organic layer was dried over MgSO<sub>4</sub> and concentrated under vacuum. PiPrOx<sub>40</sub>-NH<sub>2</sub> was isolated by precipitation into petroleum benzene. Yield = 220 mg (31%)

<sup>1</sup>H NMR (400 MHz, D<sub>2</sub>O) δ: 4.21 – 3.08 (m, NCH<sub>2</sub>CH<sub>2</sub>, 352H), 3.10 – 2.60 (d, CH<sub>3</sub>CHCH<sub>3</sub>, 39H), 2.26 – 1.91 (m, COCH<sub>3</sub>, 144H), 1.56 – 0.67 (m, 2CH<sub>3</sub>, 234H).

SEC (RI, DMAc):  $M_n$  ( $\bar{M}_m$ ) = 18,200 Da (1.09)

**PMeOx<sub>48</sub>-b-PiPrOx<sub>39</sub>-Cy5.** In an oven-dried greaseless Schlenk flask, PMeOx<sub>48</sub>-b-PiPrOx<sub>40</sub>-NH<sub>2</sub> (17 mg, 0.001 mmol, 1 eq), Cy5-NHS (7 mg, 0.006 mmol, 5 eq) and triethylamine (50 μL, 0.359 mmol, 293 eq) were dissolved in anhydrous *N,N*-dimethylformamide (1.0 mL). The reaction mixture was stirred under nitrogen in absence of light at room temperature for 14 h. Volatiles were removed under vacuum and the residue was re-dissolved in 2.0 mL of CHCl<sub>3</sub>. Excess Cy5 was removed by preparative size exclusion column chromatography (Bio-Beads™ S-X1, 600 - 14000 MW exclusion range) and PiPrOx<sub>40</sub>-Cy5 isolated as a blue solid by freeze-drying. Yield = 12 mg (65%).

<sup>1</sup>H NMR (400 MHz, D<sub>2</sub>O) δ: 8.16 – 7.93 (br, CHCHCH, 2H), 7.68 – 7.20 (m, ArH, 8H), 6.71 – 6.48 (br, CHCHCH, H), 6.36 – 6.16 (br, 2CCHCH, 2H), 4.56 – 4.37 (br, NHCH<sub>2</sub>CH<sub>2</sub>N, 2H), 4.21 – 3.08 (m, NCH<sub>2</sub>CH<sub>2</sub>, 350H), 3.10 – 2.60 (d, CH<sub>3</sub>CHCH<sub>3</sub>, 39H), 2.26 – 1.91 (m, COCH<sub>3</sub>, 144H), 1.74 – 1.58 (s, 4CH<sub>3</sub>, 12H), 1.56 – 0.67 (m, 2CH<sub>3</sub>, 234H).

SEC (RI, DMAc):  $M_n$  ( $\bar{M}_m$ ) = 17,200 Da (1.08)

### Self-Assembly Procedures

**Spontaneous nucleation method.** PMeOx-*b*-PiPrOx block copolymers (PMeOx<sub>25</sub>-*b*-PiPrOx<sub>50</sub> 1 mg/mL, PMeOx<sub>48</sub>-*b*-PiPrOx<sub>47</sub> 2 mg/mL, PMeOx<sub>96</sub>-*b*-PiPrOx<sub>49</sub> 4 mg/mL) were dissolved in Milli-Q water and filtered through a 0.45 μm nylon syringe filter. The polymer solutions were then heated in a sealed vial to 70 °C before cooling to 23 °C.

**Nanoparticle sonication.** Seed micelles were prepared by ultrasonication of micelles prepared by spontaneous nucleation (annealed at 70 °C for 1 week and used immediately). The ultrasonic processor was operated at 20% amplitude using an on:off pulse sequence of 2 s:2 s and samples cooled with an ice bath. A total sonication time of 40 minutes was used to prepare seeds from each polymer. Summary of nanoparticle length analysis is shown in Table S1 and histograms shown in Figure S10.

**Seeded growth PMeOx<sub>48</sub>-*b*-PiPrOx<sub>47</sub>.** Samples were prepared from an aqueous colloidal solution of PMeOx<sub>48</sub>-*b*-PiPrOx<sub>47</sub> seeds (1 mg/mL) and an aqueous solution of PMeOx<sub>48</sub>-*b*-PiPrOx<sub>47</sub> (1 mg/mL). Solutions were prepared as described in  $\sigma$  corresponds to standard deviation of particle length.

**Table S2** and heated to 60 °C for 16 h before cooling to 23 °C. Summary of nanoparticle length analysis is shown in  $\sigma$  corresponds to standard deviation of particle length.

**Table S2** and histograms shown in Figure S13.

**Nanorod kinetic stability.** To study the kinetic stability of POx nanorods, a 1 mg/mL D<sub>2</sub>O solution of nanorods ( $L_n = 275$  nm,  $L_w/L_n = 1.08$ ) was prepared by annealing a mixture of 1.6 mL of PMeOx<sub>48</sub>-*b*-PiPrOx<sub>47</sub> seeds (1 mg/ml in D<sub>2</sub>O) and 6.4 mL of PMeOx<sub>48</sub>-*b*-PiPrOx<sub>47</sub> unimer (1 mg/mL in D<sub>2</sub>O) at 60 °C for 16 h. This solution was split into two aliquots and which were stored at either 23 or 37 °C. Nanorod stability was monitored by <sup>1</sup>H NMR spectroscopy and TEM.

**Cy5-labelled PMeOx<sub>48</sub>-*b*-PiPrOx<sub>47</sub> nanorods.** Samples were prepared from an aqueous colloidal solution of PMeOx<sub>48</sub>-*b*-PiPrOx<sub>47</sub> seeds (1 mg/mL) and aqueous solutions of PMeOx<sub>48</sub>-*b*-PiPrOx<sub>47</sub> (1 mg/mL) and PiPrOx<sub>40</sub>-Cy5 (1 mg/mL). Solutions were prepared as described in Table S3 and S4 and heated to 60 °C for 16 h before cooling to 23 °C. Summary of nanoparticle length analysis is shown in  $\sigma$  corresponds to standard deviation of particle length.

**Table S2** and histograms shown in Figure S25.

Cy5 labelled nanorods used in the murine ex vivo biodistribution assays were concentrated to 10 mg/mL by reducing the volume of the nanorod solutions ten-fold using a centrifugal concentrator with a MWCO of 30 kDa. TEM analysis of these samples was carried out after concentration by centrifugal filtration, with samples diluted from 10 mg/mL to 1 mg/mL prior to drop casting.

### Biology

**Human blood immune cell association assay.** The method described here is based closely on those described by Caruso, Kent and coworkers in supplementary reference [2]. Human whole blood was taken via venupuncture from a single donor and stored in sodium heparin. Plasma-stripped blood was obtained by centrifugal washing of whole blood 4x with phosphate buffered saline (PBS). 90-100  $\mu$ l of whole and plasma-stripped blood was added to FACS tubes and allowed to equilibrate at 37°C for 10 min prior to addition of Cy5-labelled POx nanorods or free polymer (stock concentration: 1 mg/ml in water) to a final concentration of either 10  $\mu$ g/ml. Samples were incubated in the dark at 37°C (95% humidity, 5% CO<sub>2</sub>) for 1 h. All samples were then transferred to ice for further processing: first, red blood cell lysis was carried out utilising BD PharmLyse, with samples then incubated with appropriate antibodies for 30 min. Immune cell types identified by this assay include: CD66b+ neutrophils, CD14+ monocytes, CD19+ B cells, CD3+ T cells, CD56+ natural killer (NK) cells, and Lin1- HLA-DR+ dendritic cells (DCs); all antibodies were purchased from BD Biosciences. Samples were then washed in FACS wash buffer (2 mM EDTA, 0.5% bovine serum albumin in PBS) before cells were fixed with 10% formaldehyde. Characterisation was carried out on a BD LSRFortessa flow cytometer at medium speed, 5 decades and the FSC threshold set at 5,000. Data were analysed in FlowJo, graphed in GraphPad Prism and represent n = 2 independent experiments and n = 3 technical repeats. Raw cell counts are shown in the Supporting Schemes and Tables section.

**Ex Vivo Biodistribution.** Mice 8 weeks of age were intravenously injected with 100  $\mu$ l of 10 mg/ml nanorod solution and 24 h post injection euthanized by CO<sub>2</sub>. The heart, brain, stomach, liver, spleen, kidney, lung, muscle and blood were collected and wet-weighed. The organs were placed on a petri dish and imaged using an IVIS Lumina II imaging system (Caliper Life Sciences). All imaging parameters were kept constant and were as follows: Bin, (M)4; FOV: 12.5; f2; 2 s. The total radiant efficiency (p/s)/( $\mu$ W/cm<sup>2</sup>) of the organs as well as the standards (injected samples) were measured and background corrected. Based on the weight of the individual organs and total radiant efficiency, the data were then converted to %ID tissue g<sup>-1</sup>. For statistical analysis with a group size of n=3 per nanorod sample, data were compared by two-way ANOVA with Tukey multiple comparisons post hoc test. Statistical significance was accepted at p<0.05. Ethical approval for animal experiments were granted from the Alfred Research Alliance Animal Ethics Committee under E/1625/2016/M.

## Supporting Schemes and Tables

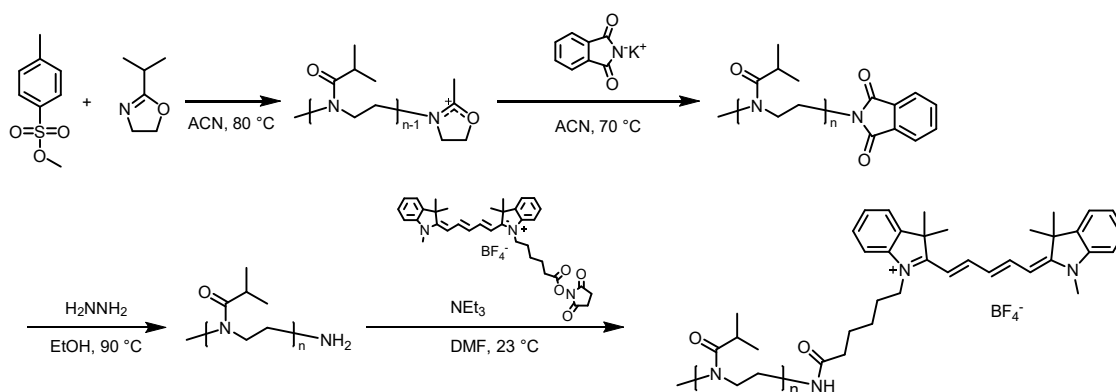Scheme S1. Synthesis of PiPrOx-Cy5 via PiPrOx-phthalimide and PiPrOx-NH<sub>2</sub>.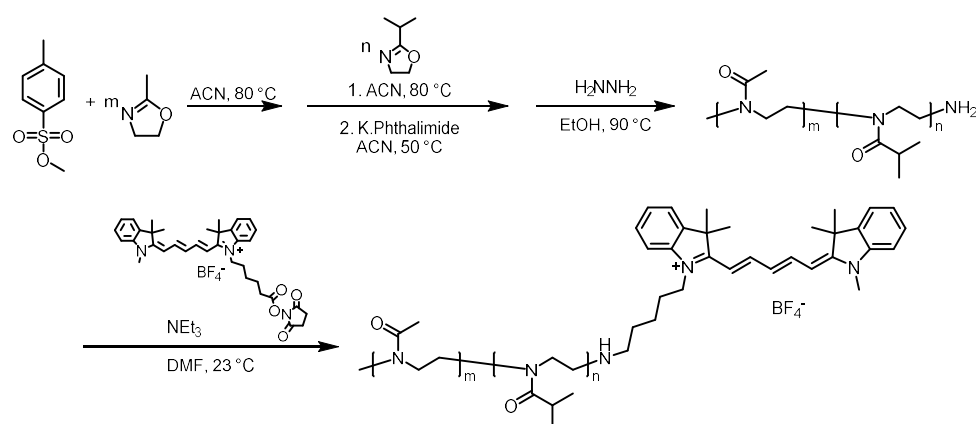Scheme S2. Synthesis of PMeOx-*b*-PiPrOx-Cy5 via PMeOx-*b*-PiPrOx-phthalimide and PMeOx-*b*-PiPrOx-NH<sub>2</sub>.Table S1. Contour length analysis by TEM of PMeOx<sub>*m*</sub>-*b*-PiPrOx<sub>*n*</sub> seed micelles prepared by ultrasonication.

| Polymer                                              | $L_n$ (nm) | $L_w$ (nm) | $L_w/L_n$ | $\sigma$ (nm) |
|------------------------------------------------------|------------|------------|-----------|---------------|
| PMeOx <sub>24</sub> - <i>b</i> -PiPrOx <sub>50</sub> | 65         | 65         | 1.17      | 23            |
| PMeOx <sub>48</sub> - <i>b</i> -PiPrOx <sub>47</sub> | 45         | 53         | 1.17      | 18            |

$\sigma$  corresponds to standard deviation of particle length.

Table S2. Sample preparation conditions and contour length analysis by TEM for PMeOx<sub>48</sub>-*b*-PiPrOx<sub>47</sub> nanorods prepared by seeded growth.

| $\frac{mass_{unimer}}{mass_{seeds}}$ | Vol. Seeds (mL) | Vol. Unimer (mL) | Vol. Water (mL) | $L_n$ (nm) | $\sigma$ (nm) | $L_w/L_n$ | $L_n/eq$ (nm/eq) |
|--------------------------------------|-----------------|------------------|-----------------|------------|---------------|-----------|------------------|
| Seeds                                | 2.000           | -                | -               | 123        | 47            | 1.15      | 123              |
| 1                                    | 1.000           | 1.000            | -               | 263        | 74            | 1.08      | 132              |
| 2                                    | 0.667           | 1.333            | -               | 324        | 105           | 1.10      | 108              |
| 3                                    | 0.500           | 1.500            | -               | 441        | 135           | 1.09      | 110              |
| 4                                    | 0.400           | 1.600            | -               | 635        | 132           | 1.04      | 127              |

## SUPPORTING INFORMATION

**Table S3.** Sample preparation conditions and contour length analysis by TEM for Cy5-labelled P<sub>MeOx</sub><sub>48</sub>-*b*-P<sub>iPrOx</sub><sub>47</sub> nanorods used in immune cell association assay.

| Sample   | Vol. Seeds (mL) | Vol. BCP Unimer (mL) | Vol. P <sub>iPrOx</sub> <sub>40</sub> -Cy5 (mL) | $L_n$ (nm) | $\sigma$ (nm) | $L_w/L_n$ |
|----------|-----------------|----------------------|-------------------------------------------------|------------|---------------|-----------|
| Short 1  | 1.980           | -                    | 0.020                                           | 63         | 25            | 1.16      |
| Short 2  | 1.980           | -                    | 0.020                                           | 69         | 30            | 1.19      |
| Medium 1 | 0.571           | 1.409                | 0.020                                           | 216        | 57            | 1.07      |
| Medium 2 | 0.571           | 1.409                | 0.020                                           | 215        | 65            | 1.09      |
| Long 1   | 0.235           | 1.745                | 0.020                                           | 467        | 140           | 1.09      |
| Long 2   | 0.235           | 1.745                | 0.020                                           | 434        | 138           | 1.10      |

**Table S4.** Sample preparation conditions and contour length analysis by TEM for Cy5-labelled P<sub>MeOx</sub><sub>48</sub>-*b*-P<sub>iPrOx</sub><sub>47</sub> used in murine ex vivo biodistribution study.

| Sample   | Vol. Seeds (mL) | Vol. BCP Unimer (mL) | Vol. P <sub>iPrOx</sub> <sub>40</sub> -Cy5 (mL) | $L_n$ (nm) | $\sigma$ (nm) | $L_w/L_n$ |
|----------|-----------------|----------------------|-------------------------------------------------|------------|---------------|-----------|
| Short 3  | 10.395          | -                    | 0.105                                           | 69         | 30            | 1.18      |
| Medium 3 | 5.250           | 5.145                | 0.105                                           | 146        | 39            | 1.07      |
| Long 3   | 2.625           | 7.770                | 0.105                                           | 284        | 67            | 1.05      |

**Table S5.** Raw cell counts for flow cytometry analysis of immune cell association in whole blood.

| Repeat                 | Control  |          | Short  |          | Medium   |        | Long     |          | P <sub>MeOx</sub> - <i>b</i> -P <sub>iPrOx</sub> -Cy5 |
|------------------------|----------|----------|--------|----------|----------|--------|----------|----------|-------------------------------------------------------|
|                        | 1        | 2        | 1      | 2        | 1        | 2      | 1        | 2        |                                                       |
| Total count            | 5.19E+05 | 5.27E+05 | 355166 | 8.85E+05 | 5.22E+05 | 264155 | 4.36E+05 | 6.42E+05 | 6.27E+05                                              |
| Granulocytes           | 16597    | 18961    | 20090  | 18659    | 23618    | 17216  | 21463    | 12255    | 8188                                                  |
| Single cells           | 14832    | 17439    | 18899  | 17412    | 21696    | 16217  | 20087    | 16562    | 6189                                                  |
| Neutrophils            | 14528    | 17117    | 18702  | 11126    | 21364    | 15971  | 19908    | 10447    | 5288                                                  |
| $\sphericalangle$ Cy5+ | 436      | 38       | 36     | 300      | 494      | 42     | 74       | 304      | 5194                                                  |
| Lymphocytes            | 57487    | 70797    | 65228  | 102071   | 57404    | 45130  | 59077    | 99376    | 48244                                                 |
| Single cells           | 55987    | 67402    | 62001  | 99684    | 56134    | 42977  | 55510    | 97405    | 45297                                                 |
| T cells                | 37210    | 53421    | 49176  | 74477    | 36092    | 33310  | 43881    | 74121    | 32400                                                 |
| $\sphericalangle$ Cy5+ | 8        | 6        | 21     | 16       | 127      | 14     | 19       | 151      | 22868                                                 |
| CD14-, CD3-            | 18427    | 13362    | 12207  | 24304    | 19617    | 8906   | 11006    | 22119    | 9413                                                  |
| B cells                | 5413     | 5575     | 5593   | 9665     | 4977     | 3302   | 3712     | 9327     | 3496                                                  |
| $\sphericalangle$ Cy5+ | 6        | 7        | 270    | 878      | 78       | 13     | 20       | 39       | 3129                                                  |
| NK cells               | 3399     | 4482     | 3829   | 7053     | 3782     | 2484   | 3751     | 6056     | 3618                                                  |
| $\sphericalangle$ Cy5+ | 9        | 2        | 1      | 4        | 32       | 3      | 2        | 19       | 2776                                                  |
| CD56-, CD19-           | 9423     | 3096     | 2634   | 7126     | 10626    | 2960   | 3353     | 6437     | 2197                                                  |
| DCs                    | 235      | 294      | 257    | 546      | 239      | 228    | 256      | 463      | 37                                                    |
| $\sphericalangle$ Cy5+ | 1        | 2        | 1      | 8        | 1        | 1      | 4        | 3        | 29                                                    |
| Monocytes              | 4105     | 2566     | 2253   | 5760     | 4284     | 1676   | 2093     | 6401     | 2522                                                  |
| Single cells           | 3947     | 2380     | 2108   | 5153     | 4089     | 1552   | 1967     | 5750     | 2272                                                  |
| CD14+ monocytes        | 2987     | 1471     | 1190   | 3997     | 3080     | 926    | 1271     | 4645     | 1479                                                  |
| $\sphericalangle$ Cy5+ | 52       | 17       | 12     | 31       | 81       | 5      | 14       | 56       | 1475                                                  |



## SUPPORTING INFORMATION

**Table S6.** Raw cell counts for flow cytometry analysis of immune cell association in plasma-stripped blood.

| <i>Repeat</i>       | <b>Control</b> |          | <b>Short</b> |          | <b>Medium</b> |          | <b>Long</b> |          | <b>PMeOx-b-<br/>PiPrOx-<br/>Cy5</b> |
|---------------------|----------------|----------|--------------|----------|---------------|----------|-------------|----------|-------------------------------------|
|                     | <i>1</i>       | <i>2</i> | <i>1</i>     | <i>2</i> | <i>1</i>      | <i>2</i> | <i>1</i>    | <i>2</i> |                                     |
| <b>Total count</b>  | 1.90E+05       | 110998   | 119522       | 2.52E+05 | 200491        | 103523   | 123464      | 257393   | 179515                              |
| <b>Granulocytes</b> | 12537          | 8070     | 9152         | 17934    | 9566          | 11138    | 8937        | 10513    | 3340                                |
| Single cells        | 11572          | 7537     | 8694         | 17158    | 8799          | 10723    | 8454        | 9852     | 2686                                |
| Neutrophils         | 11292          | 7483     | 8571         | 16650    | 8523          | 10644    | 8386        | 9549     | 2542                                |
| ↘ Cy5+              | 515            | 50       | 45           | 469      | 419           | 66       | 73          | 406      | 2524                                |
| <b>Lymphocytes</b>  | 36283          | 24992    | 26887        | 56098    | 39248         | 24378    | 24771       | 48428    | 28428                               |
| Single cells        | 35739          | 24603    | 26466        | 55575    | 38666         | 24093    | 24253       | 47987    | 27572                               |
| T cells             | 24169          | 19610    | 20208        | 41813    | 26771         | 18146    | 19074       | 36896    | 19095                               |
| ↘ Cy5+              | 4              | 28       | 30           | 13       | 56            | 165      | 40          | 63       | 18417                               |
| CD14-, CD3-         | 11326          | 4787     | 5761         | 13122    | 11649         | 5515     | 4952        | 10501    | 4680                                |
| B cells             | 2750           | 1694     | 1503         | 4030     | 2817          | 1236     | 2039        | 3101     | 1779                                |
| ↘ Cy5+              | 6              | 2        | 3            | 4        | 16            | 21       | 7           | 4        | 1699                                |
| NK cells            | 2823           | 1626     | 1770         | 4790     | 2853          | 1672     | 1871        | 3851     | 1717                                |
| ↘ Cy5+              | 13             | 6        | 5            | 1        | 33            | 24       | 8           | 8        | 1686                                |
| CD56-, CD19-        | 5570           | 1343     | 2382         | 3980     | 5779          | 2509     | 907         | 3263     | 1150                                |
| DCs                 | 250            | 246      | 236          | 580      | 246           | 203      | 165         | 491      | 41                                  |
| ↘ Cy5+              | 3              | 0        | 1            | 4        | 5             | 8        | 5           | 10       | 39                                  |
| <b>Monocytes</b>    | 3961           | 1250     | 1325         | 5144     | 3250          | 1352     | 1599        | 3287     | 1110                                |
| Single cells        | 3860           | 1211     | 1277         | 4667     | 3119          | 1318     | 1537        | 2798     | 930                                 |
| CD14+               |                |          |              |          |               |          |             |          |                                     |
| monocytes           | 2927           | 687      | 777          | 3634     | 2288          | 921      | 1101        | 1989     | 489                                 |
| ↘ Cy5+              | 17             | 2        | 3            | 29       | 23            | 8        | 1           | 29       | 489                                 |

## Supporting Figures

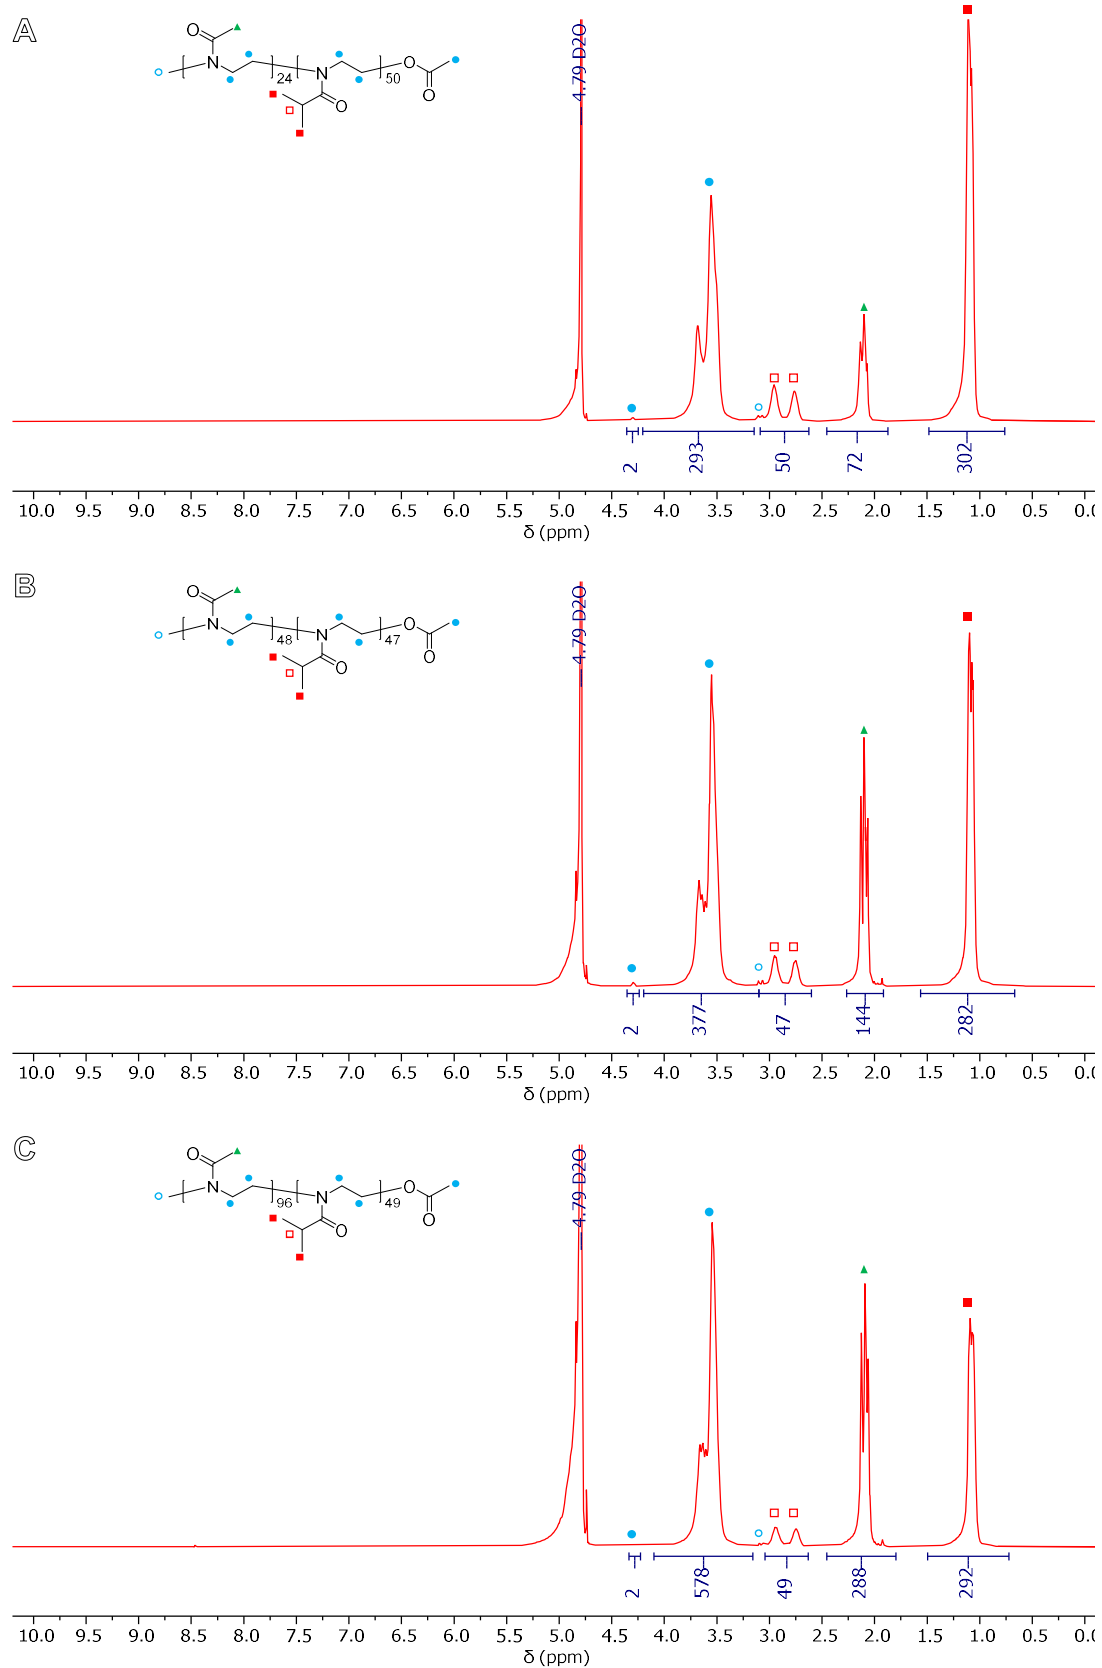

**Figure S1.**  $^1\text{H}$  NMR ( $\text{D}_2\text{O}$ , 400 MHz) spectra of P(MeO)<sub>*m*</sub>-*b*-PiPrOx<sub>*n*</sub> block copolymers. A) P(MeO)<sub>24</sub>-*b*-PiPrOx<sub>50</sub>, B) P(MeO)<sub>48</sub>-*b*-PiPrOx<sub>47</sub>, C) P(MeO)<sub>96</sub>-*b*-PiPrOx<sub>49</sub>.

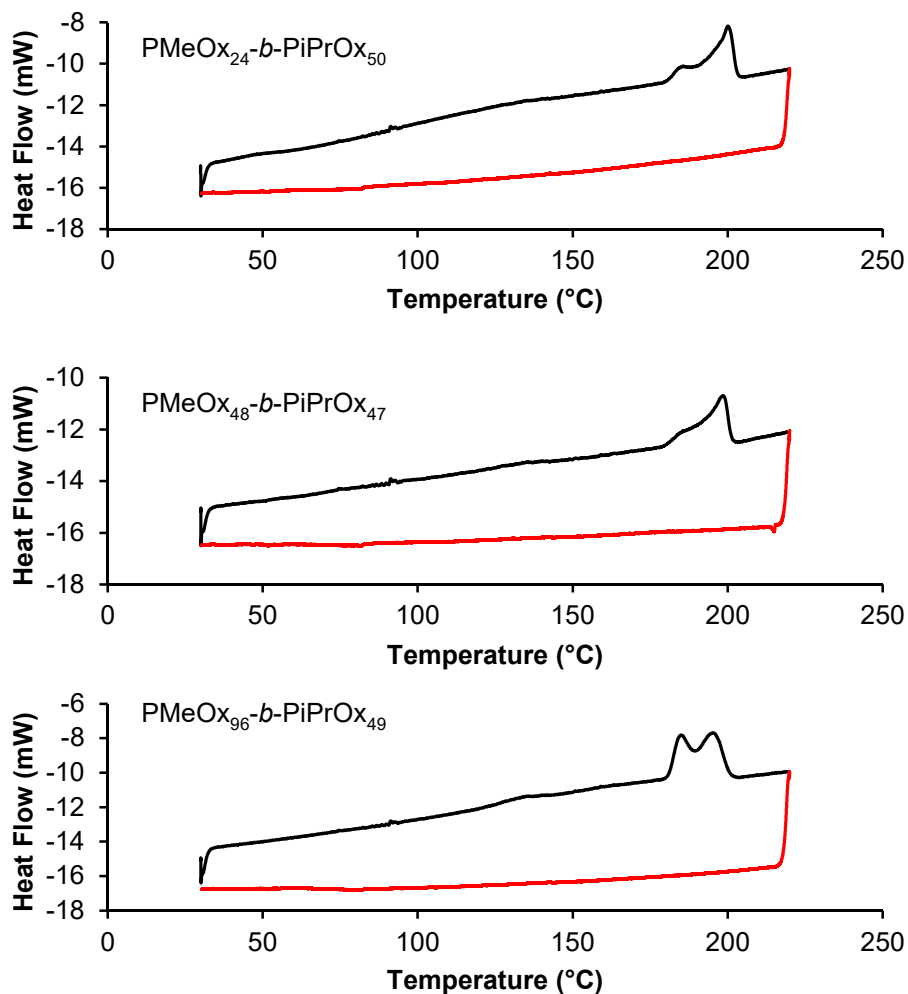

**Figure S2.** DSC analysis of PMeOx<sub>m</sub>-*b*-PiPrOx<sub>n</sub> block copolymers (heating scan black, cooling scan red, endotherms up, scan rate 10 °C/min). Prior to DSC analysis polymers were, under nitrogen, first heated to 210 °C for 10 min to erase thermal history, then annealed at 130 °C for 14 h to allow PiPrOx blocks to crystallise.

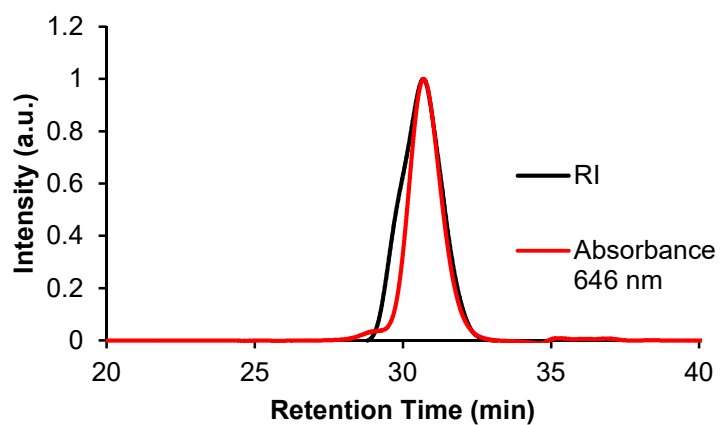

**Figure S3.** SEC chromatogram of P/PrOx<sub>40</sub>-Cy5 (absorbance at 646 nm red and RI detector black, DMAc 0.03 wt% LiBr, 1 mL/min).

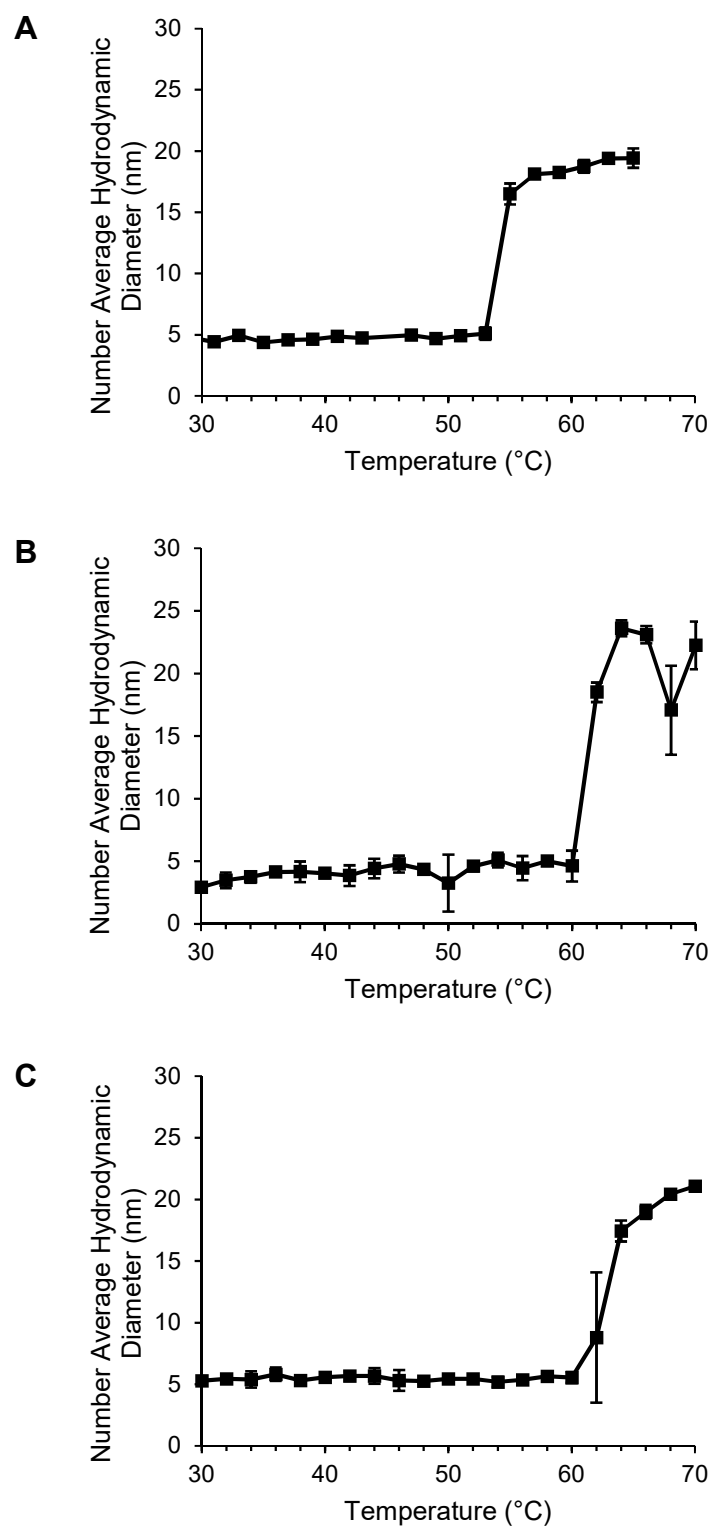

**Figure S4.** Cloud point temperature determination by DLS for  $\text{PMeOx}_m\text{-}b\text{-PiPrOx}_n$  block copolymers (10 mg/mL in MilliQ water). Y-axis reports mean hydrodynamic diameter from  $n = 3$  measurements, error bars correspond to standard deviation. A)  $\text{PMeOx}_{24}\text{-}b\text{-PiPrOx}_{50}$ , B)  $\text{PMeOx}_{48}\text{-}b\text{-PiPrOx}_{47}$ , C)  $\text{PMeOx}_{96}\text{-}b\text{-PiPrOx}_{49}$ .

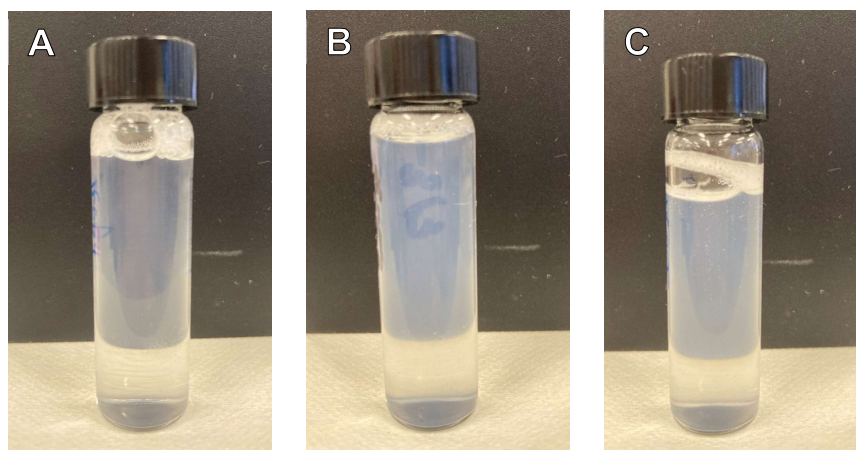

**Figure S5.** Photographs of aqueous  $\text{PMeOx}_m\text{-}b\text{-PiPrOx}_n$  suspensions after annealing at 70 °C. A)  $\text{PMeOx}_{24}\text{-}b\text{-PiPrOx}_{50}$  1 mg/mL annealed at 70 °C for 24 h. B)  $\text{PMeOx}_{48}\text{-}b\text{-PiPrOx}_{47}$  2 mg/mL annealed at 70 °C for 24 h. C)  $\text{PMeOx}_{96}\text{-}b\text{-PiPrOx}_{49}$  4 mg/mL annealed at 70 °C for 1 week.

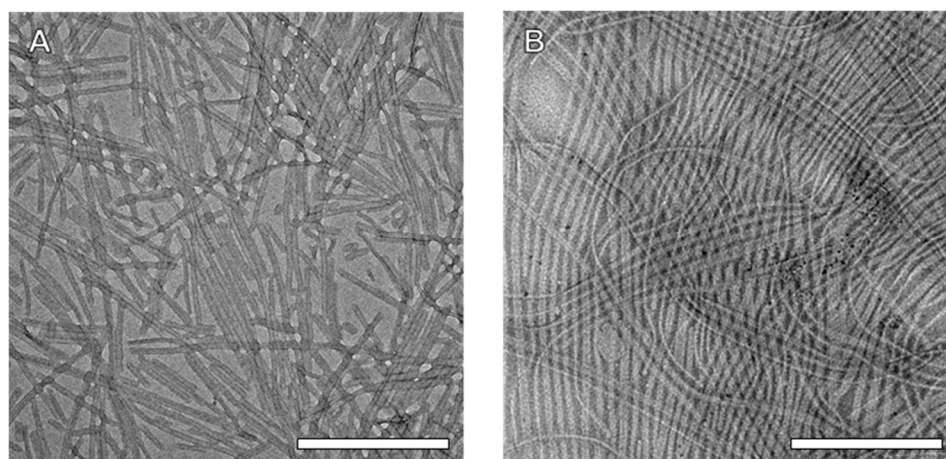

**Figure S6.** TEM images of  $\text{PMeOx}_m\text{-}b\text{-PiPrOx}_n$  fibres prepared by spontaneous nucleation method. Polymer solutions were annealed at 70 °C for 1 week. Scale bar equal to 500 nm. A)  $\text{PMeOx}_{24}\text{-}b\text{-PiPrOx}_{50}$ . B)  $\text{PMeOx}_{96}\text{-}b\text{-PiPrOx}_{49}$ .

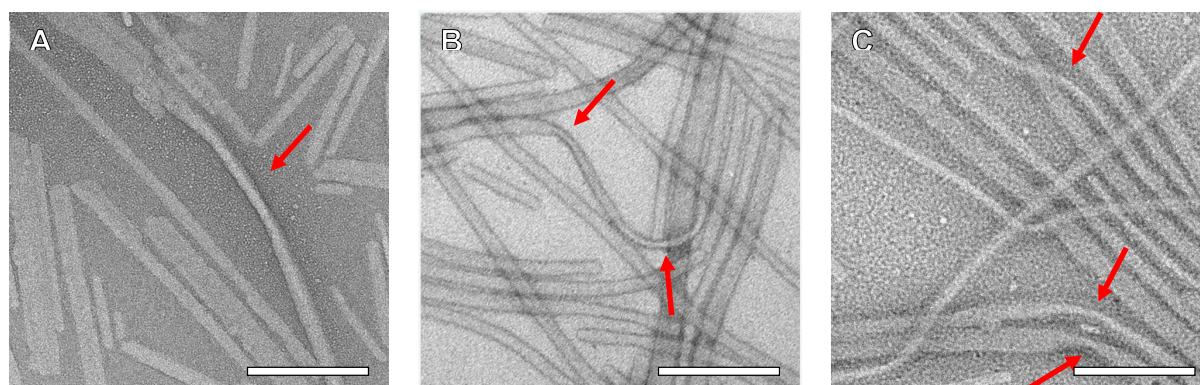

**Figure S7.** TEM images of  $\text{PMeOx}_{24}\text{-}b\text{-PiPrOx}_{50}$  (A),  $\text{PMeOx}_{48}\text{-}b\text{-PiPrOx}_{47}$  (B) and  $\text{PMeOx}_{96}\text{-}b\text{-PiPrOx}_{49}$  (C) fibres prepared by spontaneous nucleation method. Twists in fibre long axis that indicate a non-circular cross-section are denoted by red arrows. Scale bars equal to 200 nm.

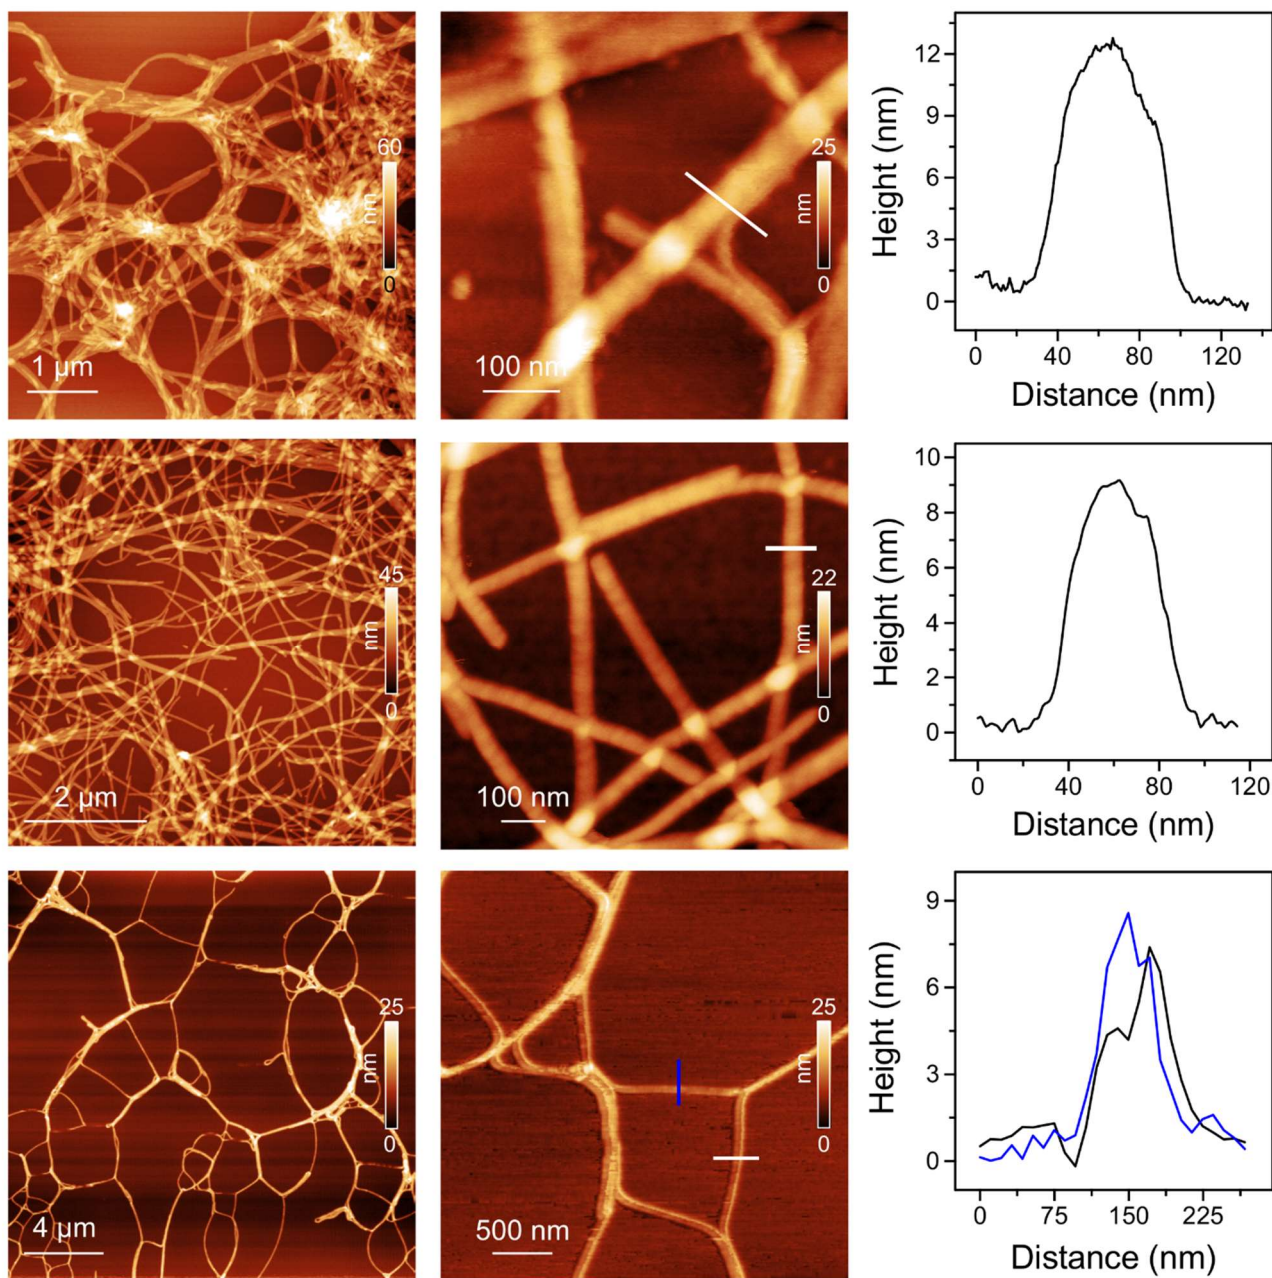

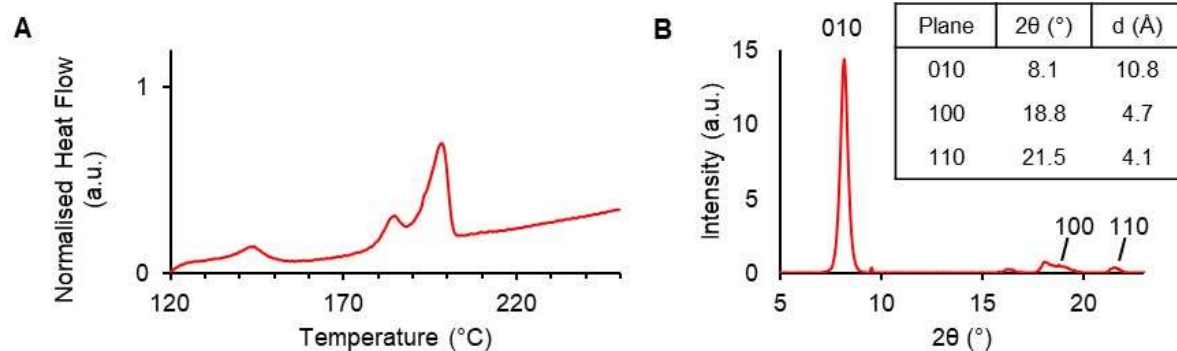

**Figure S9.** A) First DSC heating scan of freeze-dried PMeOx<sub>48</sub>-*b*-PiPrOx<sub>47</sub> fibres (endotherms up, scan rate 10 °C/min). B) WAXS analysis of freeze-dried PMeOx<sub>48</sub>-*b*-PiPrOx<sub>47</sub> fibres. Lattice planes assigned according to M. Litt et al, *J. Polym. Sci. Part A-2 Polym. Phys.* **1969**, *7*, 463–473.

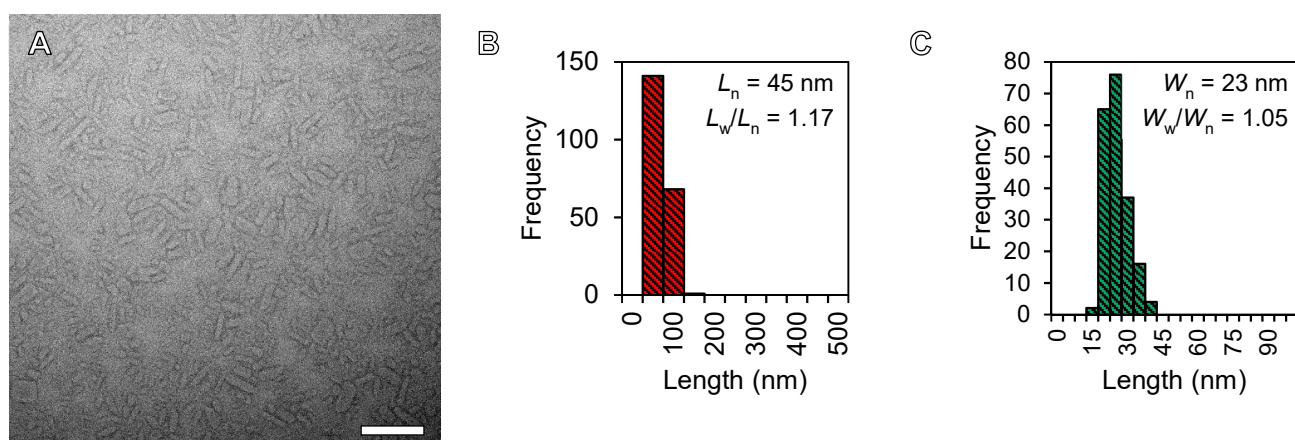

**Figure S10.** A) TEM image of PMeOx<sub>48</sub>-*b*-PiPrOx<sub>47</sub> fibre fragments prepared by ultrasonication. Scale bar equal to 200 nm. B) Nanoparticle length histogram based on TEM analysis. C) Nanoparticle width histogram based on TEM analysis.

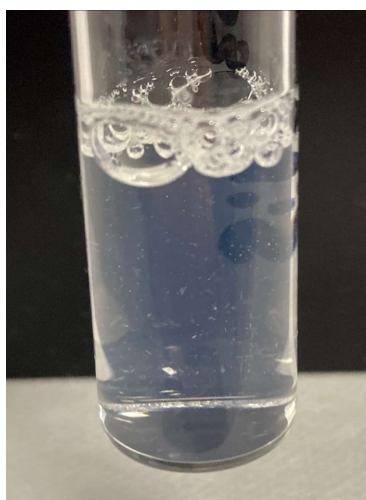

**Figure S11.** Photograph of PMeOx<sub>48</sub>-*b*-PiPrOx<sub>47</sub> suspension ( $m_{\text{unimer}}/m_{\text{seed}} = 1$ , 1 mg/mL) after annealing at 70 °C for 16 h.

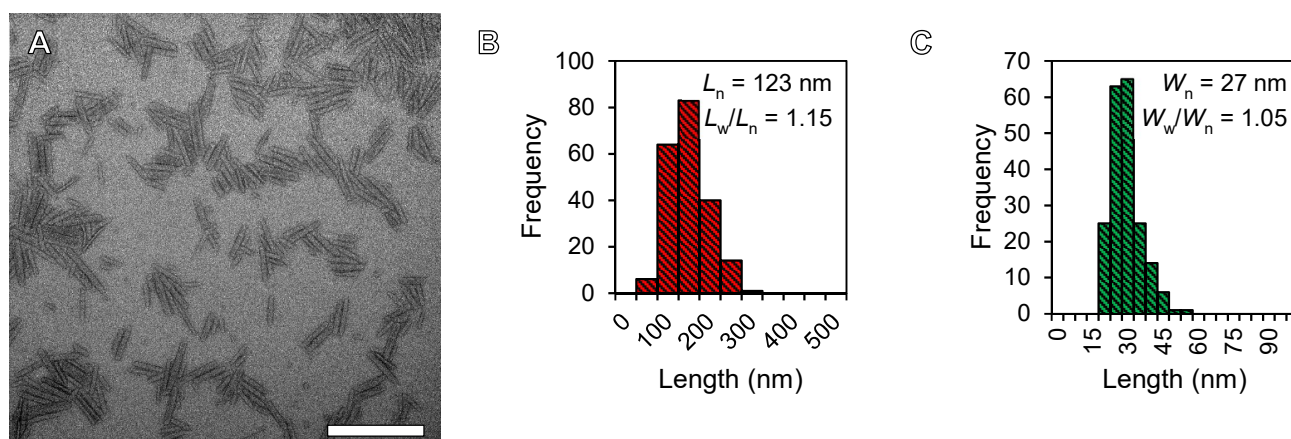

**Figure S12.** A) TEM images of  $\text{PMeOx}_{48}\text{-}b\text{-PiPrOx}_{47}$  nanorods prepared by annealing (60 °C, 16 h) seed fragments directly after ultrasonication without the addition of additional unimer. Scale bar equal to 500 nm. B) Nanoparticle length histogram based on TEM analysis. C) Nanoparticle width histogram based on TEM analysis.

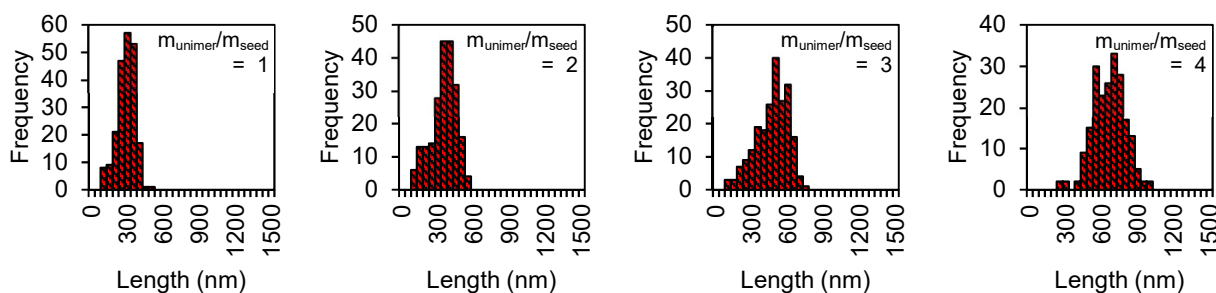

**Figure S13.**  $\text{PMeOx}_{48}\text{-}b\text{-PiPrOx}_{47}$  nanoparticle length histograms based on TEM analysis.

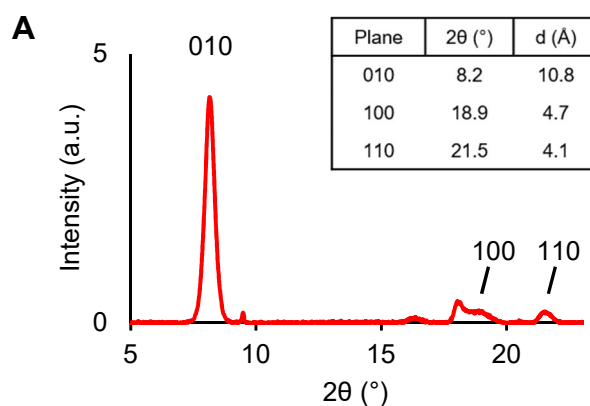

**Figure S14.** A) WAXS analysis of freeze-dried  $\text{PMeOx}_{48}\text{-}b\text{-PiPrOx}_{47}$  nanorods prepared by seeded growth with a unimer to seed mass ratio of 4. Lattice planes assigned according to M. Litt et al, *J. Polym. Sci. Part A-2 Polym. Phys.* **1969**, 7, 463–473.



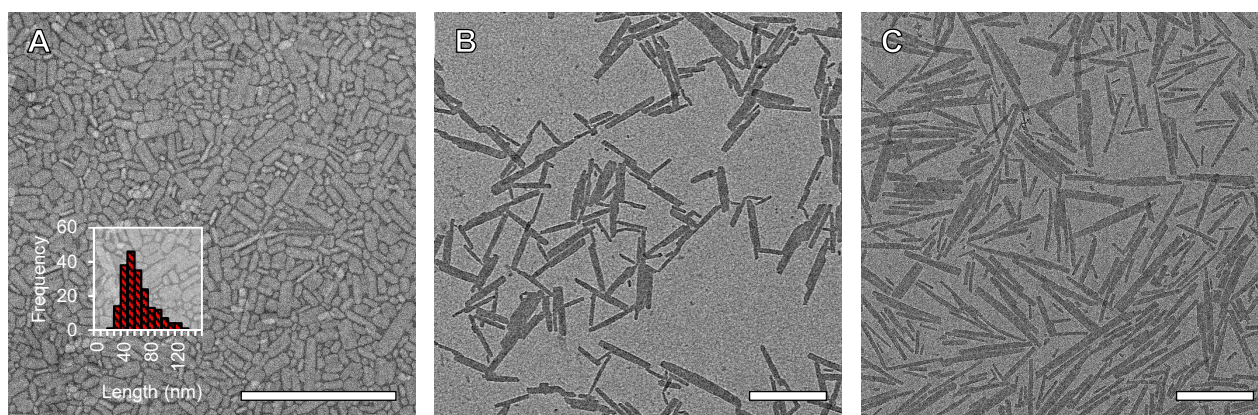

**Figure S15.** TEM images of  $\text{PMeOx}_{24}$ -*b*- $\text{PiPrOx}_{50}$  nanorods. A) Fibre fragments prepared by ultrasonication. B) Nanorods prepared by seeded growth at 60 °C (0.5 mg/mL) with a unimer to seed ratio of 2. C) Nanorods prepared by seeded growth at 60 °C (0.5 mg/mL) with a unimer to seed ratio of 4. Scale bars equal to 500 nm.

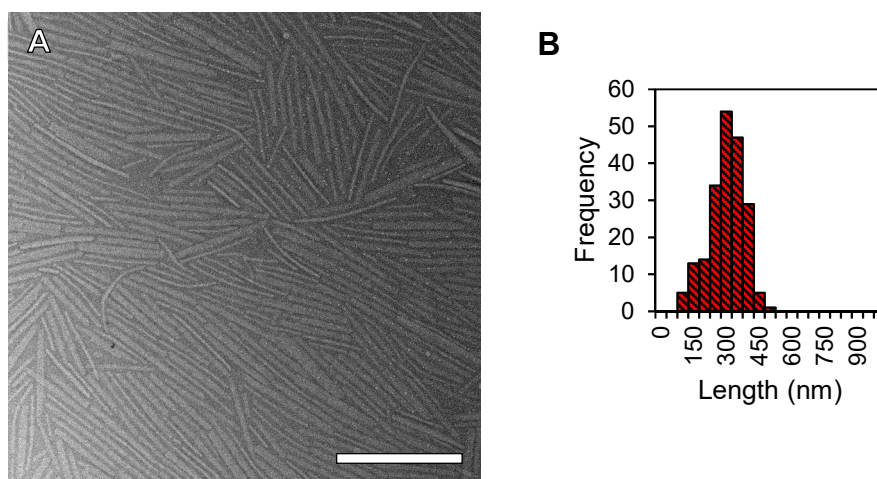

**Figure S16.** A) TEM image of  $\text{PMeOx}_{48}$ -*b*- $\text{PiPrOx}_{47}$  nanorods prepared for stability study,  $L_n = 275$  nm,  $L_w/L_n = 1.08$ . Scale bars equal to 500 nm. B) Corresponding micelle length histogram.

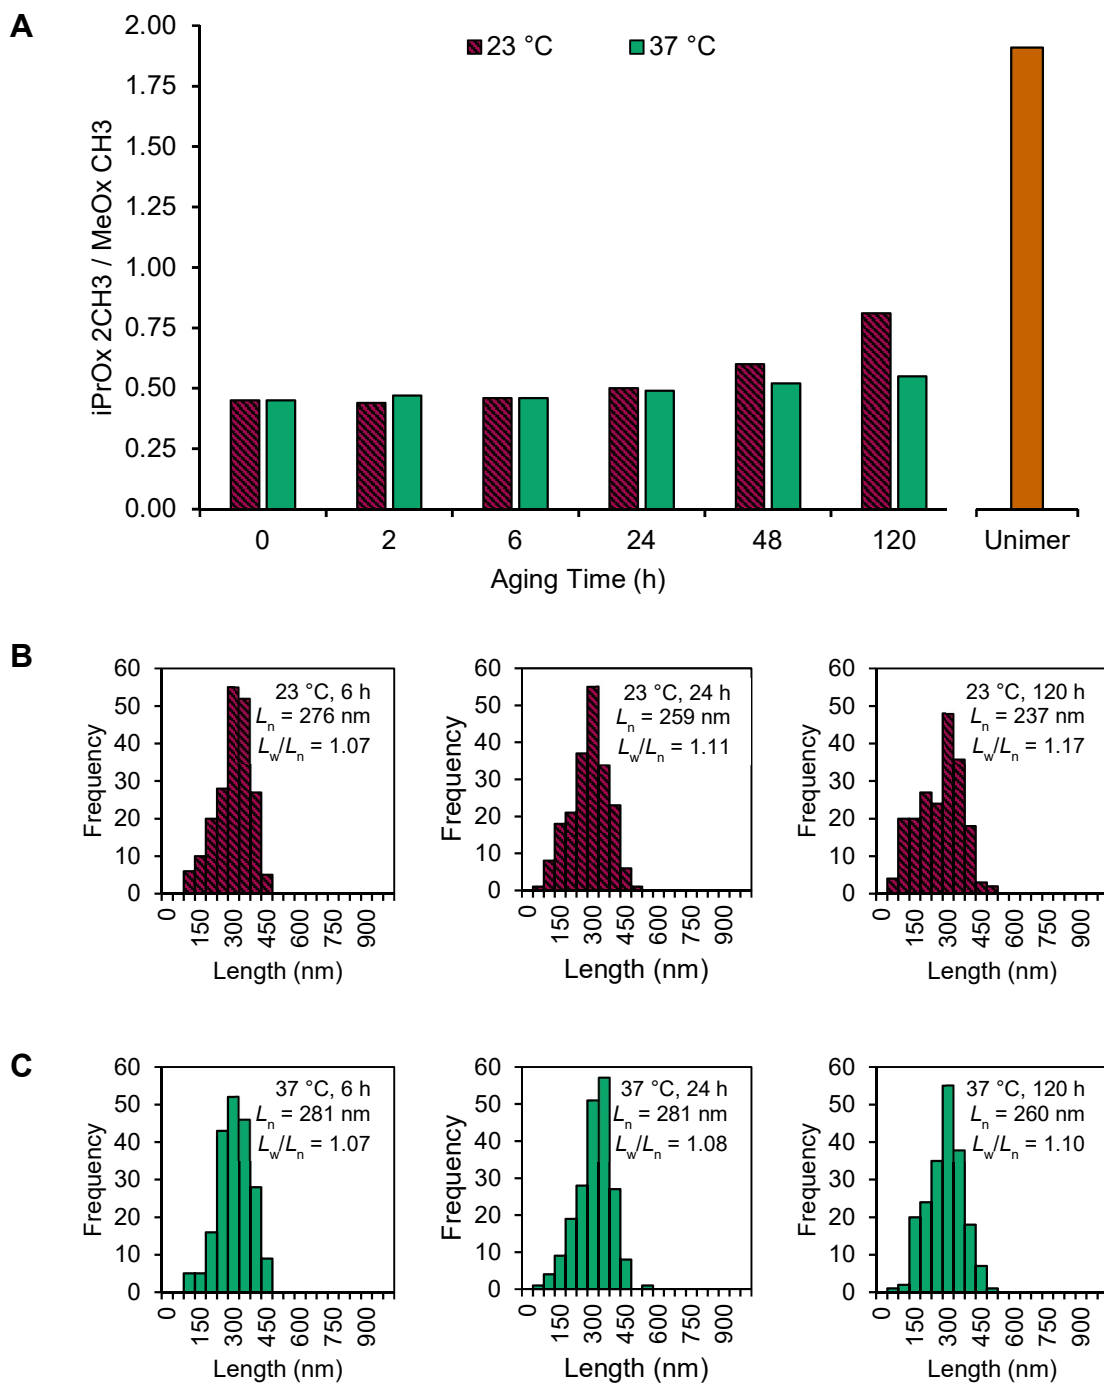

**Figure S17.** PMeO<sub>x48</sub>-*b*-PiPrOx<sub>47</sub> nanorod kinetic stability study. A) Plot showing increase over time in the ratio of the <sup>4</sup>H resonance (400 MHz, D<sub>2</sub>O) from the *i*PrOx 2CH<sub>3</sub> to that of the PMeOx CH<sub>3</sub> when a solution of PMeO<sub>x48</sub>-*b*-PiPrOx<sub>47</sub> nanorods ( $L_n = 275$  nm,  $L_w/L_n = 1.08$ ) was aged in D<sub>2</sub>O at 23 and 37 °C. For reference the ratio of these signals for a unimeric solution of PMeO<sub>x48</sub>-*b*-PiPrOx<sub>47</sub> is also shown. B) Micelle length histograms based on TEM analysis for samples stored at 23 °C. C) Micelle length histograms based on TEM analysis for samples stored at 37 °C.

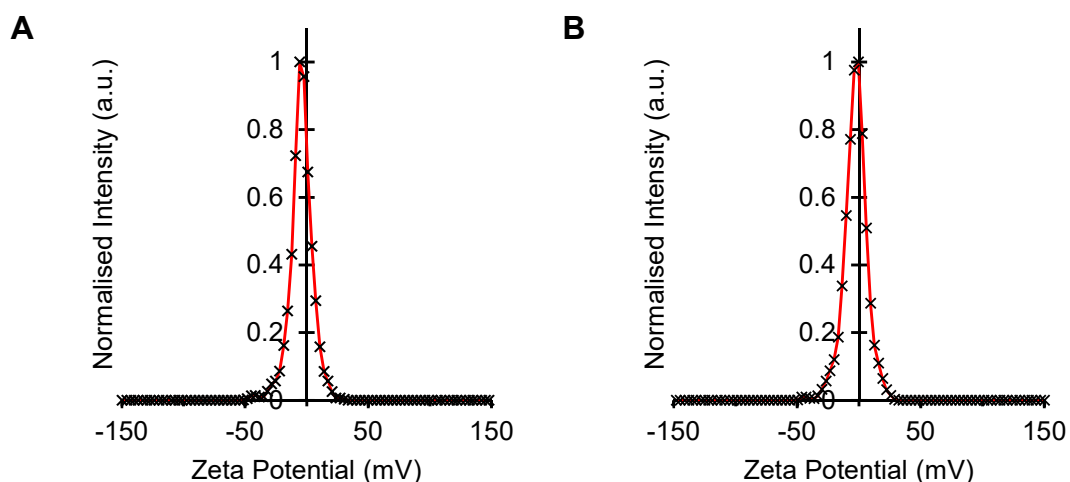

**Figure S18.** Zeta potential plots for (A) PMeOX<sub>48</sub>-*b*-PiPrOX<sub>47</sub> nanorods prepared by seeded growth ( $m_{\text{unimer}}/m_{\text{seed}} = 4$ ), and (B) Cy5-labelled PMeOX<sub>48</sub>-*b*-PiPrOX<sub>47</sub> nanorods prepared by seeded growth ( $m_{\text{unimer}}/m_{\text{seed}} = 4$ , 1 wt% PiPrOX<sub>40</sub>-Cy5). Zeta potential measured at 1 mg/mL in Milli-Q water, plots represent the mean of 3 individual measurements.

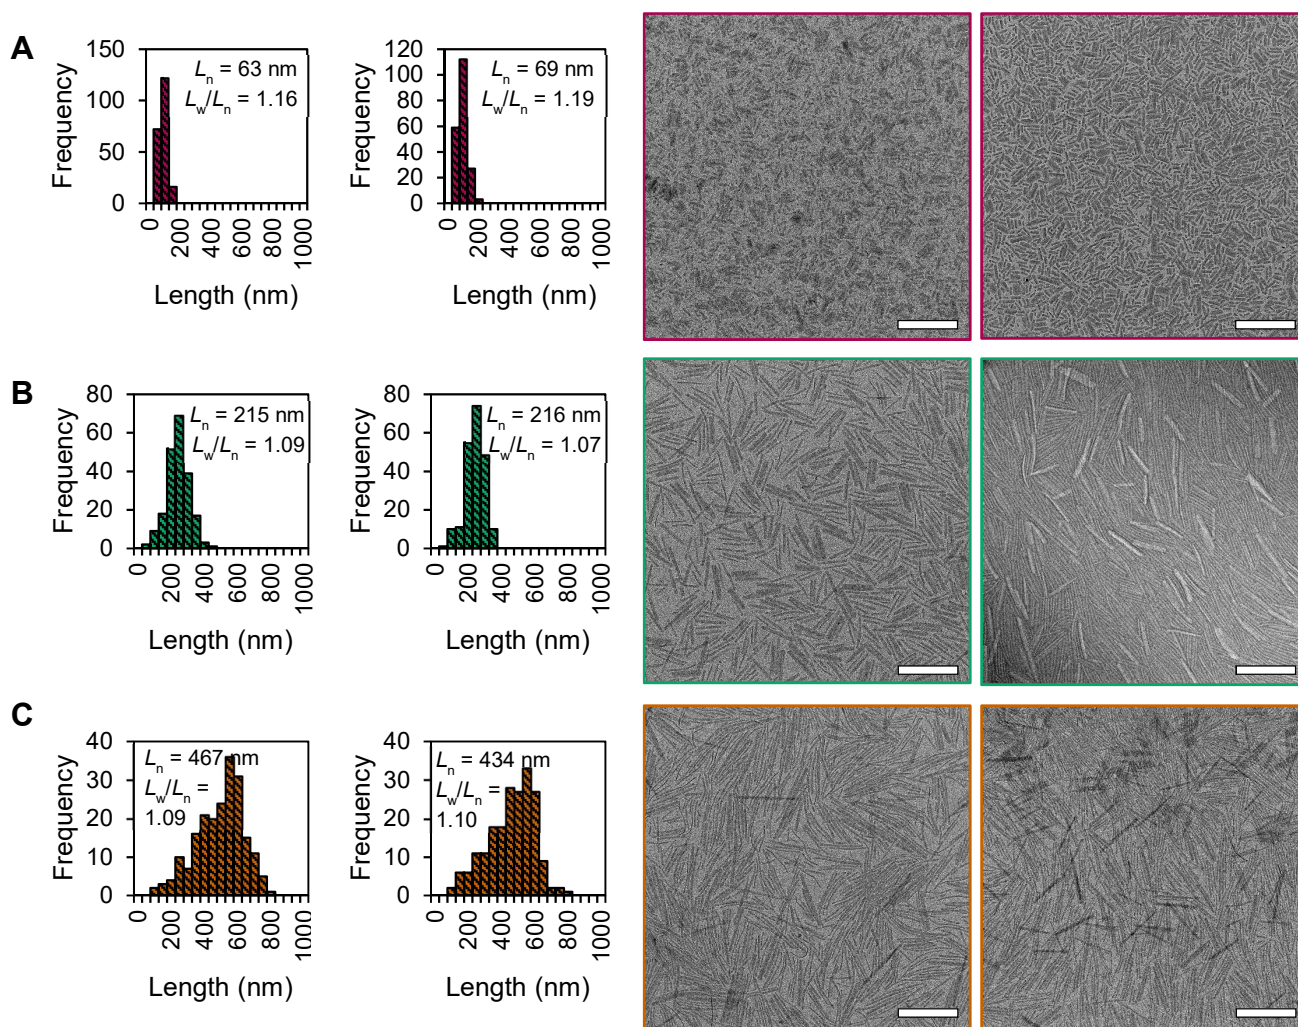

**Figure S19.** Micelle length histograms (left) based on TEM analysis and representative TEM image (right) for Cy5 labelled POx 'short' (A), 'medium' (B) and 'long' (C) nanorods used in immune cell association assay.

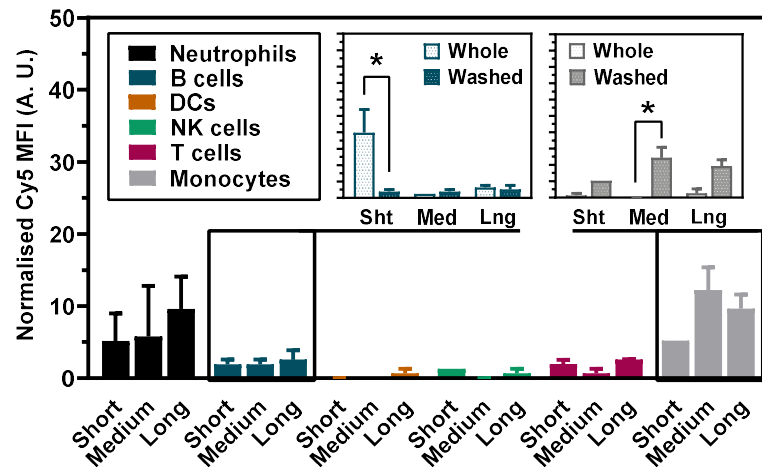

**Figure S20.** Normalised Cy5 mean fluorescence intensity (MFI) associated with different immune cell types in ‘washed’ (plasma-stripped) blood after incubation with POx-Cy5 nanorods for 1 h. Insets: comparative MFI of POx nanorods interacting with B cells (blue) and monocytes (grey) in the presence (whole) and absence (washed) of plasma. Error is standard error of mean (n = 2); \* p < 0.05 by a two-way ANOVA with Sidak’s correction for multiple comparisons.

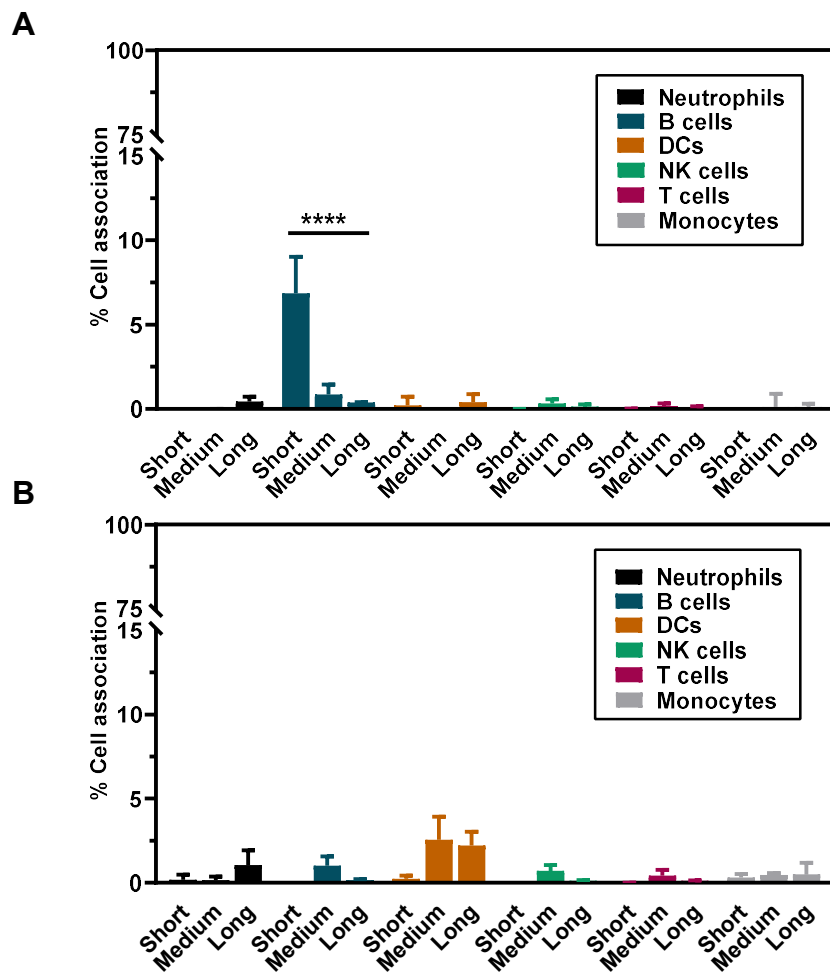

**Figure S21.** Immune cell association of POx-Cy5 nanorods after incubation for 1 h as a percentage of total cell population, in human (A) whole and (B) washed blood. Error is standard error of mean (n = 2); \*\*\*\* p < 0.0001 by a two-way ANOVA with Sidak’s correction for multiple comparisons.

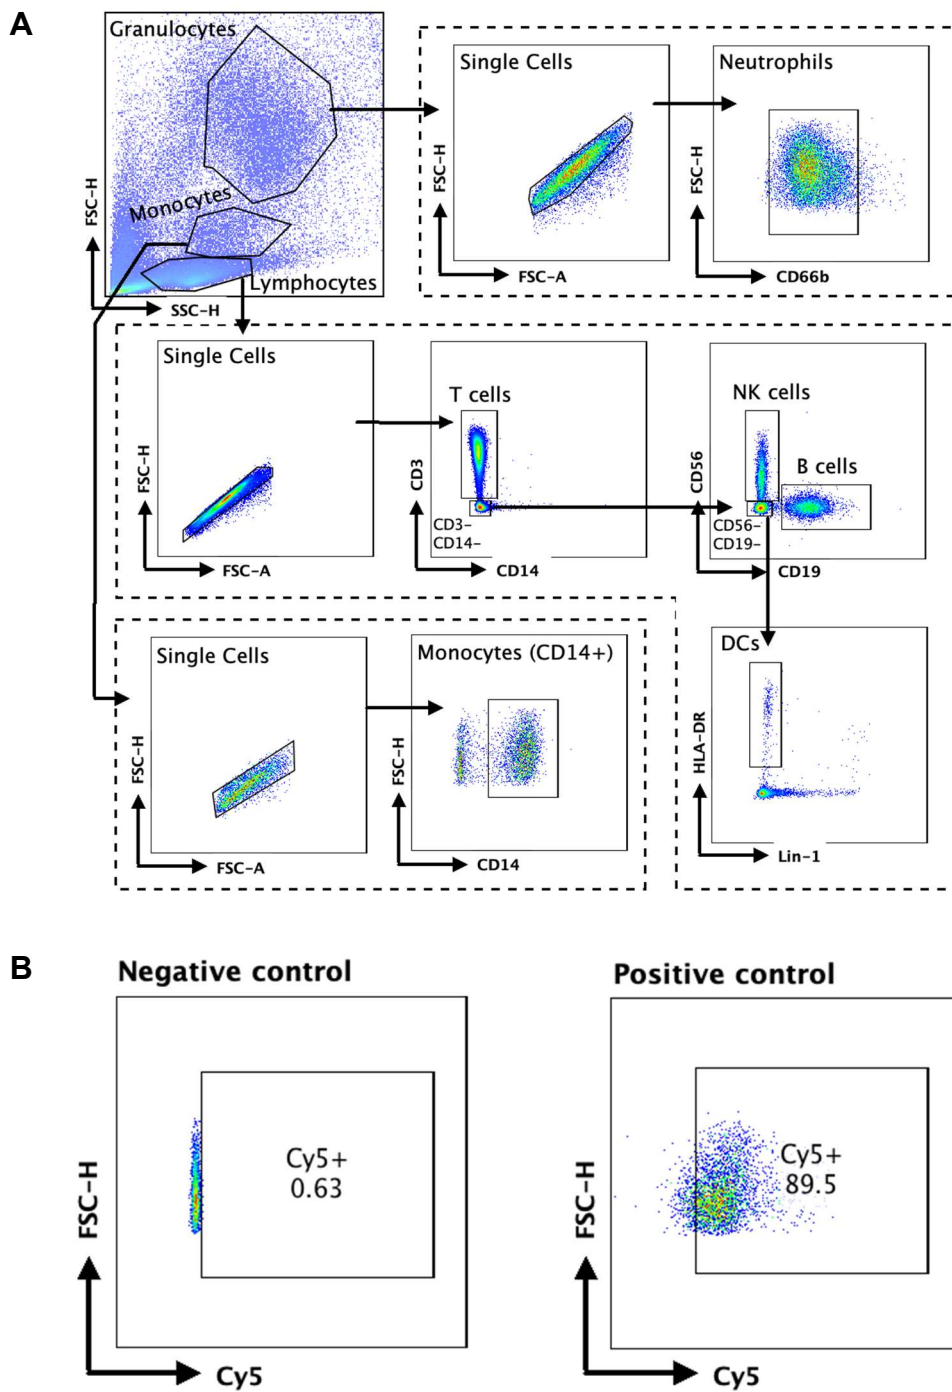

**Figure S22.** Gating strategy for flow cytometry analysis of Cy5-labelled POx nanorod localisation to immune cells in whole and washed blood. A) White blood cells were first identified and doublets excluded before specific cell types were assigned based on surface marker expression: CD66b+ neutrophils, CD3+ T cells, CD14+ monocytes, CD56+ natural killer (NK) cells, CD19+ B cells, and Lin-1- HLA-DR+ dendritic cells (DCs). B) Representative example of gating to identify POx-associated cells. Figure shows B cell negative control (cells only) and positive control (cells incubated with P<sub>MeOx48-b</sub>-P<sub>iPrOx40</sub>-Cy5).

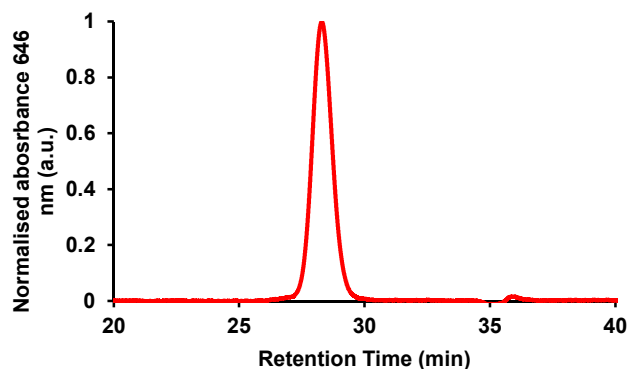

**Figure S23.** SEC chromatogram (absorbance at 646 nm, DMAc 0.03 wt% LiBr, 1 mL/min) of  $\text{PMeOx}_{48}\text{-}b\text{-PiPrOx}_{39}\text{-Cy5}$ .

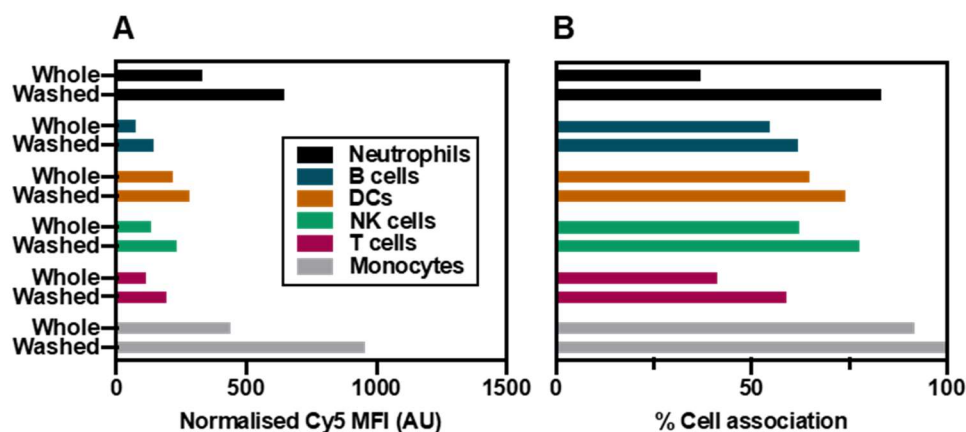

**Figure S24.** Immune cell association of  $\text{PMeOx}_{48}\text{-}b\text{-PiPrOx}_{40}\text{-Cy5}$  after incubation for 1 h as (A) normalised Cy5 mean fluorescence intensity (MFI) and (B) percentage association within the total cell population in human whole and washed blood.

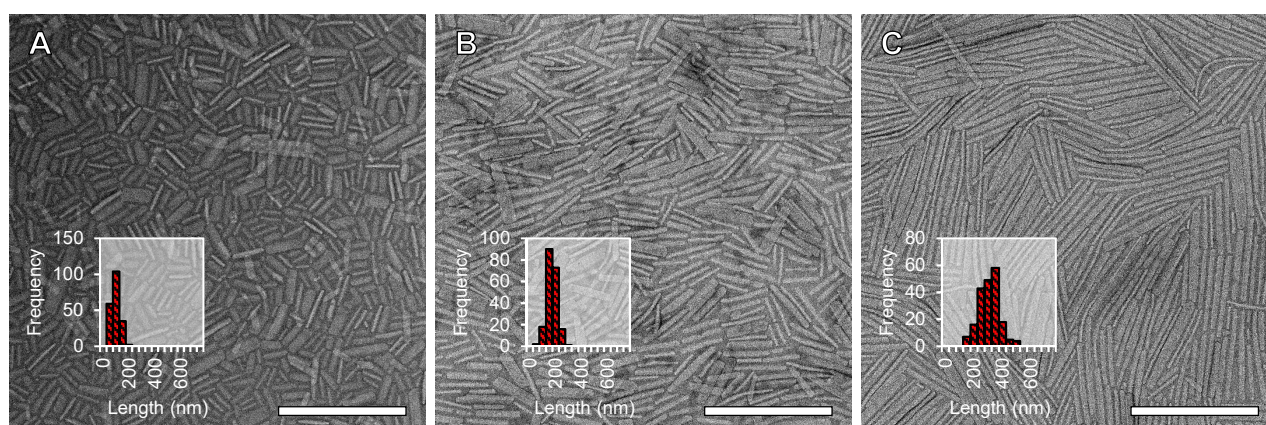

**Figure S25.** TEM images and length histograms based on TEM analysis for Cy5 labelled POx nanorods used in murine ex vivo biodistribution study. A)  $L_n = 69$  nm, B)  $L_n = 146$  nm, C)  $L_n = 284$  nm. Scale bars equal to 500 nm. TEM analysis was carried out after concentration by centrifugal filtration with samples diluted from 10 mg/mL back to 1 mg/mL prior to drop casting.

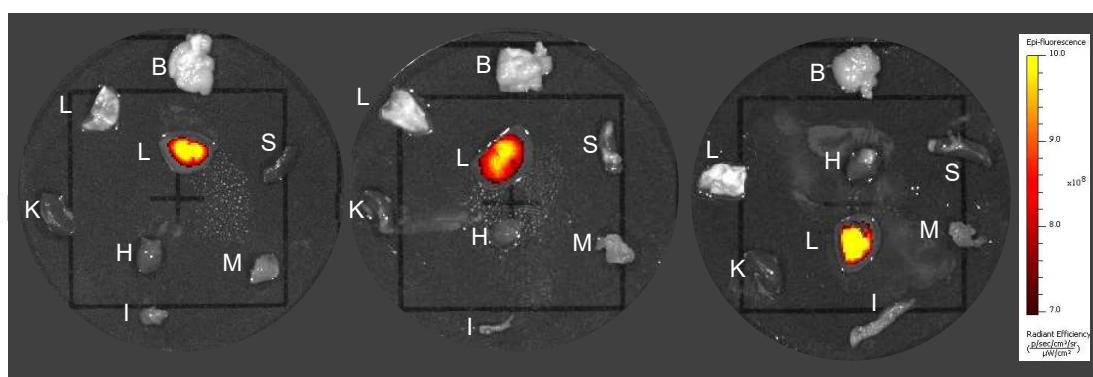

**Figure S26.** Representative images of mouse organs 24 h post injection of nanorods recorded using IVIS fluorescence imager. Left)  $L_n = 69$  nm, Centre)  $L_n = 146$  nm, Right)  $L_n = 284$  nm. (B = brain, Lu = lungs, Li = liver, S = spleen, K = kidney, H = heart, M = muscle, I = intestine).

## References

- [1] K. Kempe, M. Lobert, R. Hoogenboom, U. S. Schubert, *J. Comb. Chem.* **2009**, *11*, 274–280.
- [2] A. C. G. Weiss, H. G. Kelly, M. Faria, Q. A. Besford, A. K. Wheatley, C. S. Ang, E. J. Crampin, F. Caruso, S. J. Kent, *ACS Nano* **2019**, *13*, 4980–4991.
